# Supplementary material for: CD2 Is a Novel Immune-Related Prognostic Biomarker of Invasive Breast Carcinoma That Modulates the Tumor Microenvironment
Source: Front Immunol. 2021 Apr 23;12:664845. doi: 10.3389/fimmu.2021.664845 (PMC8102873; doi:10.3389/fimmu.2021.664845)
Supplement: Supplementary file 1 [file Table_1.xls]

Id	futime	fustat	age	gender	grade	stage	T	M	N
TCGA-A2-A0CT	2289	0	71	FEMALE	unknow	Stage IIA	T2	M0	N0 (i-)
TCGA-GM-A2DD	2282	0	53	FEMALE	unknow	Stage I	T1c	M0	N0 (i-)
TCGA-D8-A1JM	590	0	59	FEMALE	unknow	Stage IIB	T2	M0	N1a
TCGA-BH-A18Q	1692	1	56	FEMALE	unknow	Stage IIB	T2	M0	N1b
TCGA-C8-A12P	358	0	55	FEMALE	unknow	Stage IIB	T2	M0	N1
TCGA-S3-A6ZF	572	0	64	FEMALE	unknow	Stage IIA	T2	M0	N0
TCGA-BH-A18K	2763	1	46	FEMALE	unknow	Stage I	T1	M0	N0
TCGA-AN-A0FW	11	0	67	FEMALE	unknow	Stage IIIA	T2	M0	N2
TCGA-D8-A140	403	0	62	FEMALE	unknow	Stage IIB	T2	M0	N1a
TCGA-E2-A14R	1174	0	62	FEMALE	unknow	Stage IIA	T2	M0	N0
TCGA-A8-A08C	881	0	65	FEMALE	unknow	Stage IIA	T2	M0	N0
TCGA-D8-A3Z6	563	0	56	FEMALE	unknow	Stage IIIC	T3	M0	N3a
TCGA-C8-A133	0	0	65	FEMALE	unknow	Stage IIIA	T3	M0	N1
TCGA-AN-A0FF	172	0	32	FEMALE	unknow	Stage IA	T1b	M0	N0
TCGA-AC-A5EI	442	0	88	FEMALE	unknow	Stage IB	T1c	MX	N1mi
TCGA-D8-A27N	519	0	36	FEMALE	unknow	Stage IIIA	T2	M0	N2a
TCGA-D8-A1X5	565	0	81	FEMALE	unknow	Stage IIIC	T2	MX	N3a
TCGA-AR-A0TT	3316	0	53	FEMALE	unknow	Stage IIIA	T2	M0	N2
TCGA-A8-A08F	1004	0	59	FEMALE	unknow	Stage IIIC	T2	M0	N3a
TCGA-BH-A0BA	1132	0	51	FEMALE	unknow	Stage IIIC	T3	M0	N3a
TCGA-EW-A3E8	1035	0	60	FEMALE	unknow	Stage IIB	T3	MX	N0
TCGA-D8-A1XG	448	0	86	FEMALE	unknow	Stage IIIB	T4b	M0	N1a
TCGA-E2-A15L	626	0	65	FEMALE	unknow	Stage IIA	T2	M0	N0
TCGA-C8-A1HG	345	0	50	FEMALE	unknow	Stage IIA	T2	M0	N0
TCGA-AO-A0JI	1528	0	56	FEMALE	unknow	Stage IIA	T1c	M0	N1
TCGA-LL-A73Z	227	1	55	FEMALE	unknow	Stage IV	T1c	M1	NX
TCGA-AC-A62V	348	1	58	MALE	unknow	Stage IV	T2	M1	N1a
TCGA-E2-A1LL	1309	0	73	FEMALE	unknow	Stage IIIA	T3	MX	N2a
TCGA-EW-A1PC	187	0	66	FEMALE	unknow	Stage IIB	T3	MX	N0 (i-)
TCGA-AQ-A04H	754	0	61	FEMALE	unknow	Stage IIIA	T2	MX	N2a
TCGA-AR-A251	3030	0	51	FEMALE	unknow	Stage IIIA	T2	M0	N2
TCGA-BH-A0AZ	1919	0	47	FEMALE	unknow	Stage IIIA	T3	cM0 (i+)	N1a
TCGA-E9-A245	26	0	47	FEMALE	unknow	Stage IIB	T2	M0	N1
TCGA-BH-A0BQ	2255	0	39	FEMALE	unknow	Stage I	T1c	M0	N0
TCGA-A8-A09N	31	0	57	FEMALE	unknow	Stage IIIC	T2	M0	N3a
TCGA-E9-A1N4	1000	0	41	FEMALE	unknow	Stage IIIA	T2	M0	N2
TCGA-B6-A0IG	4456	1	50	FEMALE	unknow	Stage IIB	T2	M0	N1b
TCGA-AR-A0TV	2288	0	66	FEMALE	unknow	Stage IIA	T2	M0	N0
TCGA-AC-A2FO	2255	0	65	FEMALE	unknow	Stage IIB	T2	MX	N1
TCGA-AR-A24P	84	0	47	FEMALE	unknow	Stage I	T1	M0	N0
TCGA-EW-A1IZ	554	0	53	FEMALE	unknow	Stage IIIA	T2	MX	N2a
TCGA-BH-A18F	1001	0	50	FEMALE	unknow	Stage IIA	T2	M0	N0
TCGA-OK-A5Q2	64	0	59	FEMALE	unknow	Stage II	T2	MX	N1a
TCGA-A7-A26H	724	0	72	FEMALE	unknow	Stage IIA	T1	M0	N1a
TCGA-AN-A0FZ	10	0	45	FEMALE	unknow	Stage IIIA	T2	M0	N2
TCGA-GM-A4E0	2191	0	67	FEMALE	unknow	Stage IIIC	T3	M0	N3a
TCGA-A7-A4SD	441	0	52	FEMALE	unknow	Stage IIA	T2	M0	N0
TCGA-A2-A0T7	631	0	51	FEMALE	unknow	Stage IIA	T2	M0	N0 (i+)
TCGA-BH-A0B1	1148	0	66	FEMALE	unknow	Stage IIB	T2	M0	N1a
TCGA-E2-A152	2128	0	56	FEMALE	unknow	Stage I	T1c	M0	N0
TCGA-EW-A1J3	504	0	61	FEMALE	unknow	Stage IA	T1c	M0	N0
TCGA-A8-A097	365	0	65	FEMALE	unknow	Stage IIB	T2	M0	N1
TCGA-BH-A1ET	2520	1	55	FEMALE	unknow	Stage I	T1	M0	N0
TCGA-AR-A2LQ	1233	0	59	FEMALE	unknow	Stage IIB	T3	M0	N0
TCGA-E9-A5FK	812	0	60	FEMALE	unknow	Stage IIIC	T2	M0	N3
TCGA-E9-A22G	1239	0	47	FEMALE	unknow	Stage IIA	T2	M0	N0
TCGA-GI-A2C8	225	0	63	FEMALE	unknow	Stage IIIB	T4b	MX	N0
TCGA-AC-A8OS	70	0	71	FEMALE	unknow	Stage IIA	T2	MX	N0 (i-)
TCGA-AC-A7VB	250	0	51	FEMALE	unknow	Stage IIA	T1c	MX	N1a
TCGA-A2-A0T1	521	0	55	FEMALE	unknow	Stage IIIC	T3	M0	N3
TCGA-OL-A5RW	1106	0	40	FEMALE	unknow	Stage IIA	T1c	MX	N1
TCGA-AR-A1AJ	2383	0	83	FEMALE	unknow	Stage I	T1	M0	N0
TCGA-E9-A243	612	0	52	FEMALE	unknow	Stage IIA	T2	M0	N0 (i-)
TCGA-A2-A0EP	3603	0	56	FEMALE	unknow	Stage I	T1	M0	N0 (i+)
TCGA-AC-A2FF	2759	0	40	FEMALE	unknow	Stage IIB	T2	MX	N1
TCGA-AR-A1AL	2971	0	60	FEMALE	unknow	Stage IIIA	T3	M0	N1
TCGA-A8-A0A4	396	0	73	FEMALE	unknow	Stage IIA	T2	M0	N0
TCGA-D8-A1JA	502	0	60	FEMALE	unknow	unknow	T4b	M0	NX
TCGA-A8-A07G	577	0	65	FEMALE	unknow	Stage IIA	T1c	M0	N1a
TCGA-E2-A10B	1141	0	67	FEMALE	unknow	Stage IIB	T2	M0	N1a
TCGA-AR-A24U	3128	0	47	FEMALE	unknow	Stage IIA	T1	M0	N1
TCGA-B6-A40B	3152	0	76	FEMALE	unknow	Stage I	T1b	M0	N0 (i-)
TCGA-E2-A15K	275	0	58	FEMALE	unknow	Stage IIB	T2	M0	N1a
TCGA-AC-A5XS	588	0	74	FEMALE	unknow	Stage IIA	T2	MX	N0
TCGA-A7-A4SE	644	0	54	FEMALE	unknow	Stage IIA	T2	M0	N0
TCGA-GM-A5PV	412	0	63	FEMALE	unknow	Stage IIB	T2	M0	N1a
TCGA-E9-A295	375	0	71	FEMALE	unknow	Stage IIA	T2	M0	N0 (i-)
TCGA-BH-A0DD	2486	0	58	MALE	unknow	Stage IIB	T2	M0	N1a
TCGA-AR-A2LO	1198	0	46	FEMALE	unknow	Stage IIB	T2	M0	N1
TCGA-E9-A1N8	1039	0	48	FEMALE	unknow	Stage IIA	T2	M0	N0
TCGA-A2-A0CW	3283	0	67	FEMALE	unknow	Stage IIB	T2	M0	N1a
TCGA-A7-A0DC	906	0	63	FEMALE	unknow	Stage IA	T1c	M0	N0 (i-)
TCGA-AO-A0J9	1613	0	61	FEMALE	unknow	Stage IIIC	T2	M0	N3
TCGA-A8-A09Q	761	0	83	FEMALE	unknow	Stage IIIB	T4b	M0	N2a
TCGA-C8-A26V	616	0	47	FEMALE	unknow	Stage IIIA	T3	M0	N2
TCGA-EW-A6S9	463	0	34	FEMALE	unknow	Stage IIA	T1c	M0	N1
TCGA-BH-A1F2	959	1	53	FEMALE	unknow	Stage IIIB	T4b	M0	N1b
TCGA-E2-A1B5	984	0	46	FEMALE	unknow	Stage IIA	T2	M0	N0
TCGA-AO-A0JD	2190	0	59	FEMALE	unknow	Stage IIIA	T3	M0	N1a
TCGA-E9-A1RI	1449	0	43	FEMALE	unknow	Stage IIIA	T1c	M0	N2
TCGA-E2-A15E	630	0	40	FEMALE	unknow	Stage IIA	T1c	M0	N1a
TCGA-A8-A09A	304	0	40	FEMALE	unknow	Stage X	T2	M0	NX
TCGA-AR-A0TZ	3262	1	43	FEMALE	unknow	unknow	T2	M1	N2
TCGA-W8-A86G	347	0	66	FEMALE	unknow	Stage IIA	T2a	MX	N0 (i-)
TCGA-E2-A15S	428	0	34	FEMALE	unknow	Stage IIB	T2	M0	N1
TCGA-A2-A0YK	588	0	61	FEMALE	unknow	Stage IIA	T2	M0	N0 (i-)
TCGA-BH-A18V	1556	1	48	FEMALE	unknow	Stage IIB	T2	M0	N1b
TCGA-OL-A5RU	1219	0	63	FEMALE	unknow	Stage IIA	T1c	MX	N1
TCGA-BH-A0EB	745	0	69	FEMALE	unknow	Stage IA	T1c	M0	N0 (i-)
TCGA-BH-A0HK	178	0	81	FEMALE	unknow	Stage IIB	T2	M0	N1
TCGA-AQ-A1H3	989	0	49	FEMALE	unknow	Stage IIIC	T2	MX	N3a
TCGA-AR-A1AM	2991	0	52	FEMALE	unknow	Stage IIIA	T3	M0	N1
TCGA-LL-A5YN	447	0	46	FEMALE	unknow	Stage IIA	T2	M0	N0 (i-)
TCGA-E2-A1LB	2306	0	41	FEMALE	unknow	Stage IIB	T2	M0	N1
TCGA-A7-A3J0	313	0	62	FEMALE	unknow	Stage IIA	T2	M0	N0
TCGA-B6-A0IJ	7106	0	42	FEMALE	unknow	Stage IIB	T3	M0	N0 (i-)
TCGA-XX-A899	467	0	46	FEMALE	unknow	Stage IIIA	T1c	MX	N2a
TCGA-E2-A14Z	563	1	64	FEMALE	unknow	Stage I	T1c	M0	N0
TCGA-AO-A0J6	1140	0	61	FEMALE	unknow	Stage IIA	T2	M0	N0 (i-)
TCGA-GM-A5PX	551	0	65	FEMALE	unknow	Stage IIB	T2	M0	N1mi
TCGA-AO-A0JM	2184	0	40	FEMALE	unknow	Stage IIB	T2	M0	N1
TCGA-E9-A1QZ	755	0	61	FEMALE	unknow	Stage IIA	T2	M0	N0
TCGA-BH-A1EY	538	1	79	FEMALE	unknow	Stage IIA	T2	M0	N0
TCGA-E2-A1BD	1133	0	53	FEMALE	unknow	Stage IIA	T2	M0	N0
TCGA-AR-A0U2	2551	1	47	FEMALE	unknow	Stage IIIA	T2	M0	N2
TCGA-UL-AAZ6	518	0	73	FEMALE	unknow	Stage IIA	T2	MX	N0
TCGA-BH-A28Q	1119	0	46	FEMALE	unknow	Stage IIB	T2	M0	N1a
TCGA-AC-A3YI	707	0	74	FEMALE	unknow	Stage IIIC	T1c	MX	N3a
TCGA-C8-A3M8	394	0	68	FEMALE	unknow	Stage IA	T1c	M0	N0
TCGA-E9-A248	59	0	51	FEMALE	unknow	Stage IIA	T2	M0	N0 (i-)
TCGA-A7-A3J1	343	0	63	FEMALE	unknow	Stage IA	T1c	MX	N0
TCGA-AO-A03N	2031	0	59	FEMALE	unknow	Stage IIB	T2	M0	N1a
TCGA-A2-A0SY	1347	0	62	FEMALE	unknow	Stage IIIA	T3	M0	N1
TCGA-A8-A099	304	0	76	FEMALE	unknow	Stage X	T4b	MX	N3a
TCGA-AR-A0TQ	2991	0	27	FEMALE	unknow	Stage IIIA	T3	M0	N1
TCGA-AO-A12B	2989	0	63	FEMALE	unknow	Stage IIA	T2	M0	N0 (i-)
TCGA-A2-A3XV	996	0	46	FEMALE	unknow	Stage IIA	T2	M0	N0
TCGA-D8-A27T	398	0	53	FEMALE	unknow	Stage IIIC	T2	M0	N3a
TCGA-GM-A2DM	3226	0	57	FEMALE	unknow	Stage IIA	T2	M0	N0 (i-)
TCGA-C8-A12N	358	0	58	FEMALE	unknow	Stage IIA	T2	M0	N0 (i-)
TCGA-C8-A12V	385	0	55	FEMALE	unknow	Stage IIA	T2	M0	N0
TCGA-AO-A03T	2124	0	42	FEMALE	unknow	Stage IIB	T2	M0	N1a
TCGA-D8-A1X6	541	0	80	FEMALE	unknow	Stage IIIA	T3	MX	N2a
TCGA-AR-A252	2838	0	50	FEMALE	unknow	Stage I	T1	M0	N0
TCGA-LL-A5YP	450	0	49	FEMALE	unknow	Stage IIB	T2	M0	N1a
TCGA-A7-A6VV	313	0	51	FEMALE	unknow	Stage IIA	T2	M0	N0
TCGA-E2-A1L7	1836	0	40	FEMALE	unknow	Stage IIIA	T2	M0	N2
TCGA-E2-A14W	974	0	78	MALE	unknow	Stage IIA	T2	M0	N0
TCGA-E9-A5UP	803	0	63	FEMALE	unknow	Stage IIA	T2	M0	N0
TCGA-A2-A259	1596	0	70	FEMALE	unknow	Stage I	T1c	M0	N0 (i-)
TCGA-BH-A0AY	777	0	62	FEMALE	unknow	Stage IIA	T2	M0	N0 (i-)
TCGA-E2-A1B1	2653	0	45	FEMALE	unknow	Stage IIB	T2	M0	N1
TCGA-EW-A1P8	239	1	58	FEMALE	unknow	Stage IIIC	T2	M0	N3b
TCGA-EW-A1OW	694	0	58	FEMALE	unknow	Stage IIA	T2	MX	N0
TCGA-E2-A10A	1229	0	41	FEMALE	unknow	Stage IIB	T3	M0	N0 (i-)
TCGA-D8-A1X7	509	0	40	FEMALE	unknow	Stage IIA	T2	MX	N0
TCGA-E9-A5UO	785	0	41	FEMALE	unknow	Stage IIA	T2	M0	N0
TCGA-E9-A1RH	1417	0	63	FEMALE	unknow	Stage IIA	T2	M0	N0
TCGA-AR-A0TW	3009	0	50	FEMALE	unknow	Stage IIIA	T3	M0	N1
TCGA-A2-A0CX	1728	0	52	FEMALE	unknow	Stage IIA	T2	M0	N0 (i-)
TCGA-AR-A5QM	2231	0	62	FEMALE	unknow	Stage IIA	T2	M0	N0
TCGA-A8-A09E	1492	0	73	FEMALE	unknow	Stage IIIB	T4b	M0	N1a
TCGA-AN-A03Y	10	0	66	FEMALE	unknow	Stage IIA	T2	M0	N0
TCGA-HN-A2OB	1900	1	45	FEMALE	unknow	Stage IIB	T2	M0	N1
TCGA-E2-A15O	289	0	89	FEMALE	unknow	Stage I	T1c	M0	NX
TCGA-GM-A2DK	2645	0	58	FEMALE	unknow	Stage I	T1c	M0	N0 (i-)
TCGA-E2-A576	1043	0	69	FEMALE	unknow	Stage IA	T1c	MX	N0
TCGA-E2-A150	1935	0	48	FEMALE	unknow	Stage IIA	T2	M0	N0
TCGA-LD-A74U	402	0	79	FEMALE	unknow	Stage IIIC	T3	M0	N3a
TCGA-A7-A26J	627	0	49	FEMALE	unknow	Stage IIA	T2	M0	N0
TCGA-BH-A18L	811	1	50	FEMALE	unknow	Stage IIIA	T3	M0	N1mi
TCGA-B6-A0IP	3926	1	74	FEMALE	unknow	Stage IA	T1c	M0	N0 (i-)
TCGA-5T-A9QA	303	0	52	FEMALE	unknow	Stage IIA	T2	MX	NX
TCGA-BH-A0BJ	660	0	41	FEMALE	unknow	Stage IIB	T2	M0	N1a
TCGA-D8-A1J9	532	0	48	FEMALE	unknow	Stage IA	T1c	M0	N0
TCGA-B6-A0WV	2417	1	67	FEMALE	unknow	Stage IIB	T2	M0	N1b
TCGA-EW-A1OX	911	0	43	FEMALE	unknow	Stage IIA	T2	MX	N0
TCGA-D8-A1XO	1682	0	56	FEMALE	unknow	Stage IIB	T2	M0	N1a
TCGA-D8-A1JT	405	0	70	FEMALE	unknow	Stage IIA	T2	M0	N0
TCGA-A2-A25A	3276	0	44	FEMALE	unknow	Stage IIA	T2	M0	N0 (i-)
TCGA-E9-A54Y	725	0	63	FEMALE	unknow	Stage IIIA	T2	M0	N2
TCGA-A2-A04W	3102	0	50	FEMALE	unknow	Stage IIB	T2	M0	N1mi
TCGA-AN-A0XS	10	0	63	FEMALE	unknow	Stage IIIA	T2	M0	N2
TCGA-EW-A6SA	510	0	59	MALE	unknow	Stage II	T2	MX	N0 (i+)
TCGA-BH-A0BR	2330	0	59	FEMALE	unknow	Stage I	T1c	M0	N0
TCGA-AC-A3QP	675	0	79	FEMALE	unknow	Stage IIB	T2	MX	N1mi
TCGA-AN-A041	7	0	29	FEMALE	unknow	Stage IIB	T2	M0	N1a
TCGA-BH-A0GY	923	0	67	FEMALE	unknow	Stage IIA	T2	M0	N1
TCGA-E2-A1IL	118	0	78	FEMALE	unknow	Stage IIA	T1c	M0	N1a
TCGA-A8-A0A7	30	0	57	FEMALE	unknow	Stage IIB	T2	M0	N1a
TCGA-BH-A0EE	943	0	68	FEMALE	unknow	Stage IIB	T3	M0	N0 (i-)
TCGA-BH-A0EA	991	1	72	FEMALE	unknow	Stage IIA	T1c	M0	N1a
TCGA-AO-A12G	1639	0	75	FEMALE	unknow	Stage IIA	T2	M0	N0 (i+)
TCGA-A8-A082	549	0	58	FEMALE	unknow	Stage IIB	T2	M0	N1a
TCGA-D8-A1JK	0	0	90	FEMALE	unknow	Stage IIA	T2	M0	N0
TCGA-A8-A08S	1004	0	71	FEMALE	unknow	Stage IIA	T1c	M0	N1
TCGA-AN-A0XT	10	0	54	FEMALE	unknow	Stage IIIA	T2	M0	N2
TCGA-A2-A4S0	706	0	77	FEMALE	unknow	Stage IIA	T2	M0	N0
TCGA-E2-A1IN	675	0	60	FEMALE	unknow	Stage I	T1c	M0	N0
TCGA-B6-A0I9	362	1	62	FEMALE	unknow	Stage IV	T3	M1	NX
TCGA-A2-A4S3	666	0	59	FEMALE	unknow	Stage IIB	T2	M0	N1a
TCGA-C8-A12L	363	0	67	FEMALE	unknow	Stage IIA	T2	M0	N0 (i-)
TCGA-AC-A23H	0	0	90	FEMALE	unknow	Stage IIA	T2	M0	NX
TCGA-AC-A2FB	1234	0	65	FEMALE	unknow	Stage IIA	T2	MX	N0
TCGA-E2-A14P	1246	0	79	FEMALE	unknow	Stage IIIC	T2	M0	N3
TCGA-C8-A12Z	382	0	45	FEMALE	unknow	Stage IIB	T2	M0	N1
TCGA-A8-A09W	30	0	70	FEMALE	unknow	Stage IIIB	T2	M0	N3
TCGA-A2-A4S1	820	0	66	FEMALE	unknow	Stage IIA	T2	M0	N0
TCGA-AO-A0JA	655	0	36	FEMALE	unknow	Stage IIIC	T2	M0	N3
TCGA-A8-A0AB	518	0	54	FEMALE	unknow	Stage IIA	T2	M0	N0
TCGA-BH-A1F5	2712	1	62	FEMALE	unknow	Stage IIA	T1c	M0	N1a
TCGA-AN-A0FS	210	0	55	FEMALE	unknow	Stage IA	T1c	M0	N0
TCGA-A2-A0T3	1516	0	37	FEMALE	unknow	Stage IB	T1c	M0	N1mi
TCGA-B6-A0RS	3063	1	38	FEMALE	unknow	Stage IIA	T2	M0	N0 (i-)
TCGA-A8-A08H	0	0	66	FEMALE	unknow	Stage IIA	T2	M0	N0
TCGA-A2-A04N	4354	0	66	FEMALE	unknow	Stage IA	T1c	M0	N0 (i-)
TCGA-E9-A1R3	78	0	70	FEMALE	unknow	Stage IIIC	T2	M0	N3
TCGA-BH-A0GZ	328	0	62	FEMALE	unknow	Stage IIA	T1c	M0	N1a
TCGA-A8-A08P	943	0	70	FEMALE	unknow	Stage IIIA	T2	M0	N2a
TCGA-A7-A425	447	0	70	FEMALE	unknow	Stage IIIC	T3	MX	N3a
TCGA-E2-A15A	710	0	45	FEMALE	unknow	Stage IIIC	T2	M0	N3a
TCGA-MS-A51U	681	0	44	FEMALE	unknow	Stage IIB	T2	M0	N1
TCGA-C8-A8HP	396	0	59	FEMALE	unknow	Stage IIIA	T2	M0	N2
TCGA-A7-A5ZX	336	0	48	FEMALE	unknow	Stage IIIC	T2	M0	N3a
TCGA-A8-A09B	365	0	58	FEMALE	unknow	Stage IIIB	T4b	M0	N1a
TCGA-S3-A6ZH	641	0	29	FEMALE	unknow	Stage IIIC	T3	MX	N3a
TCGA-A2-A0YF	1535	0	67	FEMALE	unknow	Stage I	T1b	M0	N0 (i+)
TCGA-A2-A1FW	528	0	62	FEMALE	unknow	Stage IIIA	T3	M0	N2a
TCGA-BH-A0E2	435	0	49	FEMALE	unknow	Stage IIIA	T2	M0	N2a
TCGA-E9-A1ND	1266	0	75	FEMALE	unknow	Stage IIB	T2	M0	N1
TCGA-S3-AA10	586	0	65	FEMALE	unknow	Stage IIA	T2	M0	N0
TCGA-B6-A0RH	6456	1	51	FEMALE	unknow	Stage IIA	T2	M0	N0 (i-)
TCGA-A7-A4SB	418	0	56	FEMALE	unknow	Stage IIIA	T3	M0	N1mi
TCGA-E2-A15P	595	0	61	FEMALE	unknow	Stage IA	T1c	M0	N0
TCGA-A7-A0CG	1043	0	78	FEMALE	unknow	Stage IIA	T2	M0	N0 (i-)
TCGA-3C-AALK	1448	0	52	FEMALE	unknow	Stage IA	T1c	M0	N0 (i+)
TCGA-E9-A244	21	0	54	FEMALE	unknow	Stage IIA	T2	M0	N0 (i-)
TCGA-AO-A03L	2442	0	34	FEMALE	unknow	Stage IIIA	T3	M0	N2
TCGA-OL-A5S0	620	0	66	FEMALE	unknow	Stage IIB	T2	MX	N1a
TCGA-E2-A570	931	0	47	FEMALE	unknow	Stage IB	T1c	M0	N1mi
TCGA-AR-A0TY	1699	1	54	FEMALE	unknow	Stage IIA	T2	M0	N0
TCGA-AR-A256	2854	1	45	FEMALE	unknow	Stage IIA	T2	M0	N0
TCGA-BH-A1EU	1286	1	83	FEMALE	unknow	Stage I	T1	M0	N0
TCGA-LL-A6FQ	80	0	77	FEMALE	unknow	Stage IIIA	T2	MX	N2a
TCGA-GM-A2DI	2590	0	52	FEMALE	unknow	Stage I	T1c	M0	N0 (i+)
TCGA-A7-A0DB	1007	0	56	FEMALE	unknow	Stage IIA	T2	M0	N0 (i-)
TCGA-BH-A0BM	1876	0	54	FEMALE	unknow	Stage IIB	T2	M0	N1a
TCGA-A8-A081	0	0	80	FEMALE	unknow	Stage IIA	T2	M0	N0
TCGA-3C-AAAU	4047	0	55	FEMALE	unknow	Stage X	TX	MX	NX
TCGA-D8-A1XF	463	0	45	FEMALE	unknow	Stage IIA	T2	M0	N0
TCGA-E9-A229	1148	0	37	FEMALE	unknow	Stage IA	T1c	M0	N0
TCGA-D8-A4Z1	659	0	68	FEMALE	unknow	Stage IA	T1c	M0	N0
TCGA-OL-A5RY	752	0	52	FEMALE	unknow	Stage IIA	T1c	MX	N1
TCGA-AC-A23G	2248	0	76	FEMALE	unknow	Stage IIA	T1c	MX	N1
TCGA-E9-A1R7	1467	0	64	FEMALE	unknow	Stage IIA	T2	M0	N0
TCGA-C8-A27B	439	0	48	FEMALE	unknow	Stage IIB	T3	M0	N0
TCGA-B6-A409	573	1	44	FEMALE	unknow	Stage IIIA	T1c	M0	N2a
TCGA-E2-A109	1417	0	64	FEMALE	unknow	Stage IIA	T2	M0	N0 (i-)
TCGA-AC-A3BB	987	0	46	FEMALE	unknow	Stage IIIA	T3	MX	N2a
TCGA-EW-A3U0	532	0	61	FEMALE	unknow	Stage IIIA	T3	M0	N1a
TCGA-A2-A04P	548	1	36	FEMALE	unknow	Stage IIIC	T2	M0	N3c
TCGA-A8-A083	0	0	67	FEMALE	unknow	Stage IIB	T3	M0	N0
TCGA-E2-A14O	1359	0	76	FEMALE	unknow	Stage IIIA	T3	M0	N1a
TCGA-BH-A0B0	2477	0	56	FEMALE	unknow	Stage I	T1c	M0	N0
TCGA-D8-A73W	385	1	79	FEMALE	unknow	Stage IIIA	T3	MX	N1a
TCGA-AN-A0AJ	303	0	79	FEMALE	unknow	Stage IIB	T3	M0	N0
TCGA-C8-A26X	376	0	58	FEMALE	unknow	Stage IIA	T1	M0	N1
TCGA-D8-A27P	49	0	64	FEMALE	unknow	Stage IA	T1c	M0	N0
TCGA-BH-A8FY	295	1	87	FEMALE	unknow	Stage IA	T1c	M0	N0 (i+)
TCGA-OL-A5RZ	679	0	57	FEMALE	unknow	Stage IA	T1b	MX	N0
TCGA-EW-A1OV	789	0	56	FEMALE	unknow	Stage IIB	T2	MX	N1mi
TCGA-AR-A1AO	2618	0	47	FEMALE	unknow	Stage IIA	T1	M0	N1
TCGA-AN-A04C	54	0	51	FEMALE	unknow	Stage IIB	T2	M0	N1
TCGA-A2-A25E	3204	0	34	FEMALE	unknow	Stage IIIA	T2	M0	N2a
TCGA-A2-A1G6	501	0	50	FEMALE	unknow	Stage IIIA	T2	M0	N2a
TCGA-AR-A1AK	3159	0	70	FEMALE	unknow	Stage I	T1	M0	N0
TCGA-AC-A3W6	0	0	90	FEMALE	unknow	Stage IIIA	T3	MX	N1
TCGA-BH-A0HO	76	0	48	FEMALE	unknow	Stage IIA	T1c	M0	N1a
TCGA-S3-A6ZG	562	0	71	FEMALE	unknow	Stage IIB	T2	M0	N1
TCGA-BH-A1FJ	1927	1	66	FEMALE	unknow	Stage IIIA	T3	M0	N1b
TCGA-E2-A1IG	2140	0	45	FEMALE	unknow	Stage IIB	T2	M0	N1mi
TCGA-BH-A0B6	2483	0	47	FEMALE	unknow	Stage I	T1c	M0	N0
TCGA-AN-A0FT	214	0	63	FEMALE	unknow	Stage IIB	T2	M0	N1
TCGA-EW-A6SB	760	0	62	FEMALE	unknow	Stage II	T2	M0	N0
TCGA-B6-A0IM	3873	1	75	FEMALE	unknow	Stage IIB	T3	M0	N0 (i-)
TCGA-AO-A03O	2483	1	69	FEMALE	unknow	Stage IIA	T2	M0	N0 (i-)
TCGA-BH-A0EI	1926	0	51	FEMALE	unknow	Stage IIA	T1c	M0	N1a
TCGA-BH-A18J	612	1	56	FEMALE	unknow	Stage IV	T4b	M1	N2
TCGA-C8-A1HN	394	0	56	FEMALE	unknow	Stage IIA	T2	M0	N0
TCGA-GM-A2DA	6593	1	46	FEMALE	unknow	Stage IIB	T2	M0	N1b
TCGA-A8-A08J	1127	1	52	FEMALE	unknow	Stage IV	T4b	M1	N3
TCGA-EW-A1PH	607	0	52	FEMALE	unknow	Stage IIA	T1c	M0	N1a
TCGA-B6-A0X5	2097	1	61	FEMALE	unknow	Stage IIB	T2	M0	N1b
TCGA-EW-A1OY	908	0	63	FEMALE	unknow	Stage IIA	T2	MX	N0
TCGA-BH-A2L8	612	0	45	FEMALE	unknow	Stage IIA	T2	M0	N0 (i-)
TCGA-BH-A1FL	1673	1	69	FEMALE	unknow	Stage IIB	T2	M0	N1b
TCGA-C8-A9FZ	592	0	49	FEMALE	unknow	Stage IIB	T2	M0	N1
TCGA-B6-A0X4	860	1	62	FEMALE	unknow	Stage IIB	T2	M0	N1b
TCGA-AO-A03M	1866	0	29	FEMALE	unknow	Stage I	T1c	M0	N0 (i-)
TCGA-PL-A8LZ	302	0	29	FEMALE	unknow	Stage IIIB	T4b	M0	N2
TCGA-A2-A0CR	3283	0	54	FEMALE	unknow	Stage IIB	T3	M0	N0
TCGA-A8-A0A2	579	0	66	FEMALE	unknow	Stage IIA	T2	M0	N0
TCGA-A7-A0CD	1165	0	66	FEMALE	unknow	Stage I	T1	M0	N0
TCGA-EW-A1P5	703	0	77	FEMALE	unknow	Stage IIB	T2	M0	N1a
TCGA-E2-A1IO	1855	0	37	FEMALE	unknow	Stage I	T1c	M0	N0
TCGA-A8-A08L	30	1	89	FEMALE	unknow	Stage IIIA	T3	M0	N2a
TCGA-AR-A2LJ	2632	0	40	FEMALE	unknow	Stage IIIA	T3	MX	N1
TCGA-BH-A1FC	3472	1	78	FEMALE	unknow	Stage IIA	T1c	M0	N1b
TCGA-A8-A08A	30	0	89	FEMALE	unknow	Stage I	T1c	M0	N0
TCGA-PE-A5DD	1953	0	64	FEMALE	unknow	Stage IIA	T2	M0	N0
TCGA-GI-A2C9	3342	0	58	FEMALE	unknow	Stage IIB	T3	MX	N0
TCGA-D8-A27M	410	0	59	FEMALE	unknow	Stage IA	T1c	M0	N0
TCGA-E9-A1RF	200	0	68	FEMALE	unknow	Stage IIIA	T2	M0	N2
TCGA-E9-A1RB	976	1	40	FEMALE	unknow	Stage IIA	T2	M0	N0
TCGA-A8-A096	0	0	73	FEMALE	unknow	Stage IIA	T2	M0	N0
TCGA-D8-A1JG	1612	0	62	FEMALE	unknow	Stage IIA	T2	M0	N0
TCGA-BH-A0DO	1644	0	78	FEMALE	unknow	Stage I	T1c	M0	N0
TCGA-AQ-A54O	1001	0	51	MALE	unknow	Stage IIA	T2	M0	N0
TCGA-A1-A0SQ	554	0	45	FEMALE	unknow	Stage IIB	T2	MX	N1
TCGA-BH-A6R9	160	0	61	FEMALE	unknow	Stage IIA	T2	M0	N0
TCGA-LL-A50Y	762	0	84	FEMALE	unknow	Stage IIA	T2	MX	N0
TCGA-E2-A1L8	2240	0	52	FEMALE	unknow	Stage IIB	T2	M0	N1a
TCGA-C8-A132	383	0	56	FEMALE	unknow	Stage IIB	T2	M0	N1
TCGA-EW-A2FR	1673	0	59	FEMALE	unknow	Stage IIIC	T1b	MX	N3a
TCGA-AR-A0U4	3261	0	54	FEMALE	unknow	Stage IIA	T2	M0	N0
TCGA-A2-A0D3	1873	0	42	FEMALE	unknow	Stage IA	T1c	M0	N0 (i-)
TCGA-BH-A1FU	1688	1	44	FEMALE	unknow	Stage IA	T1c	M0	N0
TCGA-E9-A1N6	678	1	52	FEMALE	unknow	Stage IIB	T2	M0	N1
TCGA-BH-A0DZ	495	0	43	FEMALE	unknow	Stage IIB	T2	M0	N1a
TCGA-A2-A0YE	554	0	48	FEMALE	unknow	Stage IIB	T2	M0	N1a
TCGA-A2-A3KD	1206	0	47	FEMALE	unknow	Stage IIIA	T3	M0	N1mi
TCGA-D8-A3Z5	1015	0	54	FEMALE	unknow	Stage IIIC	T2	M0	N3a
TCGA-LL-A740	441	0	61	FEMALE	unknow	Stage IA	T1c	MX	N0 (i-)
TCGA-AC-A3TN	456	0	75	FEMALE	unknow	Stage IIB	T3	MX	N0
TCGA-A8-A07W	304	0	76	FEMALE	unknow	Stage IV	T2	M1	NX
TCGA-GM-A2DH	2193	0	58	FEMALE	unknow	Stage I	T1c	M0	N0 (i+)
TCGA-E9-A22B	1167	0	71	FEMALE	unknow	Stage IA	T1c	M0	N0
TCGA-C8-A12Q	385	1	78	FEMALE	unknow	Stage IIIA	T1	M0	N2
TCGA-A8-A06T	1614	0	75	FEMALE	unknow	Stage IIIA	T3	M0	N1a
TCGA-BH-A18N	468	1	88	FEMALE	unknow	Stage IIA	T2	M0	N1b
TCGA-BH-A0DS	78	0	71	FEMALE	unknow	Stage IIIA	T2	M0	N2a
TCGA-AR-A0U1	4052	0	36	FEMALE	unknow	Stage IIB	T2	M0	N1
TCGA-B6-A0X1	7455	1	48	FEMALE	unknow	unknow	T2	M1	N1
TCGA-A1-A0SH	1437	0	39	FEMALE	unknow	Stage IIA	T2	M0	N0 (i-)
TCGA-BH-A0H9	1247	0	69	FEMALE	unknow	Stage IIA	T2	M0	N0 (i-)
TCGA-BH-A0HL	72	0	56	FEMALE	unknow	Stage IIB	T2	M0	N1a
TCGA-E2-A1AZ	2329	0	63	FEMALE	unknow	Stage IIB	T2	M0	N1a
TCGA-BH-A42T	320	1	75	FEMALE	unknow	Stage IIA	T2	M0	N0 (i+)
TCGA-D8-A27G	409	0	75	FEMALE	unknow	Stage IIA	T2	M0	N0
TCGA-A7-A26F	738	0	55	FEMALE	unknow	Stage IA	T1	M0	N0
TCGA-BH-A42U	3364	0	80	FEMALE	unknow	Stage IIA	T2	M0	N0
TCGA-A8-A06X	943	1	77	FEMALE	unknow	Stage IIB	T3	M0	N0
TCGA-AO-A1KT	541	0	78	FEMALE	unknow	Stage IIA	T1	M0	N1
TCGA-WT-AB44	883	0	77	FEMALE	unknow	Stage IA	T1c	MX	N0 (i-)
TCGA-AN-A0FJ	242	0	59	FEMALE	unknow	Stage IV	T2	M1	N2
TCGA-BH-A0H6	747	0	82	FEMALE	unknow	Stage I	T1b	M0	NX
TCGA-B6-A0IC	0	1	90	FEMALE	unknow	Stage X	T2	MX	NX
TCGA-EW-A1IW	371	0	80	FEMALE	unknow	Stage IIB	T2	MX	N1a
TCGA-D8-A1JL	611	0	72	FEMALE	unknow	Stage IIA	T2	M0	N0
TCGA-A7-A3IZ	322	0	62	FEMALE	unknow	Stage IIA	T2	M0	N0 (i+)
TCGA-A2-A3XW	1712	0	42	FEMALE	unknow	Stage IIB	T2	M0	N1a
TCGA-BH-A1EW	1694	1	38	FEMALE	unknow	Stage IIA	T2	M0	N1b
TCGA-E9-A1R4	186	0	66	FEMALE	unknow	Stage IA	T1c	M0	N0
TCGA-EW-A1J2	403	0	50	FEMALE	unknow	unknow	T1c	MX	N1mi
TCGA-BH-A0HB	806	0	55	FEMALE	unknow	Stage IA	T1c	M0	N0 (i-)
TCGA-A8-A08R	30	0	52	FEMALE	unknow	Stage IIB	T2	M0	N1a
TCGA-EW-A1P0	1251	0	55	FEMALE	unknow	Stage IIB	T2	MX	N1b
TCGA-A7-A5ZW	326	0	47	FEMALE	unknow	Stage IIA	T1c	M0	N1a
TCGA-AR-A0U0	1988	0	73	FEMALE	unknow	Stage IIB	T2	M0	N1
TCGA-D8-A1X8	783	0	62	FEMALE	unknow	Stage IIIA	T1c	M0	N2a
TCGA-C8-A130	370	0	52	FEMALE	unknow	Stage IIIA	T3	M0	N2
TCGA-E2-A1LH	3247	0	59	FEMALE	unknow	Stage I	T1c	M0	N0
TCGA-AR-A1AY	1026	0	65	FEMALE	unknow	Stage I	T1	M0	N0
TCGA-5L-AAT1	1471	0	63	FEMALE	unknow	Stage IV	T2	M1	N0
TCGA-E9-A22H	1232	0	42	FEMALE	unknow	Stage IIB	T2	M0	N1
TCGA-EW-A1J1	575	0	38	FEMALE	unknow	Stage IIB	T2	M0	N1a
TCGA-LL-A7T0	376	0	70	FEMALE	unknow	Stage IIB	T2	M0	N1a
TCGA-B6-A0IO	5042	0	66	FEMALE	unknow	Stage IIA	T2	M0	N0 (i-)
TCGA-BH-A28O	1120	0	50	FEMALE	unknow	Stage IIIC	T3a	M0	N3
TCGA-EW-A6SC	952	0	60	FEMALE	unknow	Stage IIA	T2	M0	N0
TCGA-4H-AAAK	348	0	50	FEMALE	unknow	Stage IIIA	T2	M0	N2a
TCGA-A2-A0EN	4088	0	70	FEMALE	unknow	Stage IIA	T2	M0	N0 (i+)
TCGA-E2-A1IF	1138	0	74	FEMALE	unknow	Stage I	T1c	M0	N0
TCGA-A8-A06Y	791	0	66	FEMALE	unknow	Stage IIA	T2	M0	N0
TCGA-A2-A0D4	767	0	37	FEMALE	unknow	Stage IIB	T2	M0	N1a
TCGA-OL-A5D6	1104	1	71	FEMALE	unknow	Stage IIA	T2	MX	N0
TCGA-AC-A62Y	530	0	79	FEMALE	unknow	Stage IIB	T2	MX	N1
TCGA-EW-A1OZ	1229	0	56	FEMALE	unknow	Stage IIA	T2	M0	N0 (i-)
TCGA-AC-A62X	417	0	72	FEMALE	unknow	Stage IIA	T2	MX	N0
TCGA-E2-A156	726	0	61	FEMALE	unknow	Stage I	T1c	M0	N0
TCGA-E9-A1R6	339	0	63	FEMALE	unknow	Stage IIA	T2	M0	N0
TCGA-EW-A1J6	875	0	70	FEMALE	unknow	Stage I	T1c	M0	N0 (i-)
TCGA-E9-A1RA	1369	0	48	FEMALE	unknow	Stage IA	T1c	M0	N0
TCGA-AR-A24S	2976	0	61	FEMALE	unknow	Stage I	T1	M0	N0
TCGA-AN-A0FD	196	0	71	FEMALE	unknow	Stage IIA	T2	M0	N0
TCGA-E9-A5FL	24	0	65	FEMALE	unknow	Stage IIB	T3	M0	N0
TCGA-AC-A7VC	1	0	56	FEMALE	unknow	Stage IIB	T3	MX	N0
TCGA-EW-A1PA	575	0	59	FEMALE	unknow	Stage IIB	T2	M0	N1a
TCGA-PE-A5DE	2645	0	41	FEMALE	unknow	Stage IIA	T2	M0	N0
TCGA-C8-A135	393	0	64	FEMALE	unknow	Stage IIB	T2	M0	N1
TCGA-BH-A1F0	785	1	80	FEMALE	unknow	Stage IIA	T1a	M0	N1c
TCGA-BH-A1EX	1508	1	67	FEMALE	unknow	Stage IIB	T2	M0	N1b
TCGA-UU-A93S	116	1	63	FEMALE	unknow	Stage IV	T4d	M1	N3b
TCGA-AC-A2QJ	446	1	48	FEMALE	unknow	Stage IIIB	T4b	M0	N0
TCGA-BH-A202	795	0	60	FEMALE	unknow	Stage II	T2	M0	N0
TCGA-AO-A126	3307	0	39	FEMALE	unknow	Stage IIA	T2	M0	N0 (i-)
TCGA-AR-A0TU	709	0	35	FEMALE	unknow	Stage IIA	T2	M0	N0
TCGA-AO-A0J4	1587	0	41	FEMALE	unknow	Stage IA	T1c	M0	N0 (i-)
TCGA-A2-A0SX	1534	0	48	FEMALE	unknow	Stage IA	T1c	M0	N0 (i-)
TCGA-BH-A0AU	1914	0	45	FEMALE	unknow	Stage IIA	T2	M0	N0
TCGA-A7-A13F	765	0	44	FEMALE	unknow	Stage IIIA	T3	M0	N1a
TCGA-A2-A04R	3709	0	36	FEMALE	unknow	Stage IA	T1	M0	N0 (i-)
TCGA-BH-A1FR	1642	1	73	FEMALE	unknow	Stage IIIB	T4b	M0	N1a
TCGA-B6-A0RL	2469	1	60	FEMALE	unknow	Stage IIA	T2	M0	N0 (i-)
TCGA-EW-A1PE	320	0	56	FEMALE	unknow	Stage IIA	T1c	M0	N1a
TCGA-AO-A0J2	997	0	41	FEMALE	unknow	Stage IA	T1c	M0	N0 (i-)
TCGA-AO-A0JE	2335	0	53	FEMALE	unknow	Stage IIIA	T2	M0	N2a
TCGA-BH-A0E1	477	0	52	FEMALE	unknow	Stage IIB	T2	M0	N1
TCGA-C8-A12U	385	0	46	FEMALE	unknow	Stage IIB	T2	M0	N1
TCGA-A8-A06U	883	1	80	FEMALE	unknow	Stage IIB	T2	M0	N1a
TCGA-AR-A1AT	1272	1	62	FEMALE	unknow	Stage IIA	T2	M0	N0
TCGA-B6-A0RP	3126	1	73	FEMALE	unknow	unknow	T2	M0	N1b
TCGA-E2-A15D	526	0	47	FEMALE	unknow	Stage IIA	T2	M0	N0
TCGA-E2-A1B4	1004	1	74	FEMALE	unknow	Stage IIIA	T1c	M0	N2a
TCGA-AC-A2QI	588	0	76	FEMALE	unknow	Stage IIIA	T3	MX	N1a
TCGA-BH-A18G	149	0	81	FEMALE	unknow	Stage IA	T1c	M0	N0
TCGA-D8-A1JS	371	0	77	FEMALE	unknow	Stage IA	T1c	M0	N0
TCGA-AO-A124	3506	0	38	FEMALE	unknow	Stage IIA	T2	M0	N0 (i-)
TCGA-A2-A0T0	533	0	59	FEMALE	unknow	Stage IIB	T2	M0	N1
TCGA-EW-A2FV	788	0	39	FEMALE	unknow	Stage IIIC	T3	MX	N3a
TCGA-AR-A0TR	160	1	68	FEMALE	unknow	Stage IIB	T2	M0	N1
TCGA-AO-A12F	1842	0	36	FEMALE	unknow	Stage IIA	T2	M0	N0 (i-)
TCGA-GM-A2DN	3091	0	58	FEMALE	unknow	Stage IIA	T2	M0	N0 (i-)
TCGA-BH-A0E7	1363	0	79	FEMALE	unknow	Stage IIB	T2	M0	N1a
TCGA-E9-A1RG	647	0	62	FEMALE	unknow	Stage IIIA	T1c	M0	N2
TCGA-AR-A24T	3202	0	46	FEMALE	unknow	Stage IIIC	T3	M0	N3
TCGA-A7-A26E	954	0	71	FEMALE	unknow	Stage IIIA	T3	MX	N1a
TCGA-D8-A1XQ	499	0	69	FEMALE	unknow	Stage IIA	T2	M0	N0
TCGA-D8-A27E	530	0	66	FEMALE	unknow	Stage IA	T1c	M0	N0
TCGA-E9-A249	217	0	45	FEMALE	unknow	Stage IIA	T2	M0	N0 (i-)
TCGA-D8-A146	643	0	57	FEMALE	unknow	Stage IIA	T2	MX	N0
TCGA-D8-A1XL	606	0	34	FEMALE	unknow	Stage IIB	T2	MX	N1a
TCGA-A2-A3XY	1093	1	49	FEMALE	unknow	Stage IIB	T2	M0	N1a
TCGA-E2-A10E	865	0	64	FEMALE	unknow	Stage IIA	T1c	M0	N1a
TCGA-B6-A400	215	0	43	FEMALE	unknow	Stage IIIA	T2	M0	N2a
TCGA-AN-A04A	90	0	36	FEMALE	unknow	Stage IIIA	T2	M0	N2
TCGA-A7-A3IY	345	0	71	FEMALE	unknow	Stage I	T1c	M0	N0
TCGA-A7-A0D9	1139	0	37	FEMALE	unknow	Stage IIA	T2	M0	N0 (i-)
TCGA-BH-A0BP	2296	1	76	FEMALE	unknow	Stage I	T1c	M0	N0
TCGA-EW-A1P3	1611	0	48	FEMALE	unknow	Stage IIA	T2	MX	N0
TCGA-AO-A0JJ	1887	0	54	FEMALE	unknow	Stage IIB	T2	M0	N1a
TCGA-BH-A0HU	392	0	52	FEMALE	unknow	Stage IA	T1c	M0	N0 (i-)
TCGA-E2-A14S	1009	0	65	FEMALE	unknow	Stage I	T1c	M0	N0
TCGA-BH-A0WA	701	0	82	FEMALE	unknow	Stage I	T1c	M0	N0 (i-)
TCGA-BH-A0RX	170	0	59	FEMALE	unknow	Stage IIA	T2	M0	N0 (i-)
TCGA-BH-A1FN	2192	1	34	FEMALE	unknow	Stage IIA	T2	M0	N0
TCGA-A2-A3XZ	1532	0	46	FEMALE	unknow	Stage I	T1c	M0	N0
TCGA-A1-A0SD	437	0	59	FEMALE	unknow	Stage IIA	T2	M0	N0
TCGA-A7-A6VX	317	0	68	FEMALE	unknow	Stage IIA	T2	M0	N0
TCGA-OL-A66L	1301	0	71	FEMALE	unknow	Stage IA	T1c	MX	N0
TCGA-B6-A0X7	1781	1	62	FEMALE	unknow	Stage X	T1c	MX	NX
TCGA-PL-A8LY	8	0	30	FEMALE	unknow	Stage IIB	T3	M0	N0
TCGA-A2-A0EQ	2426	0	64	FEMALE	unknow	Stage IIA	T2	M0	N0 (i-)
TCGA-AR-A2LK	1649	1	62	FEMALE	unknow	Stage III	T3	M0	N2
TCGA-A2-A0EW	1884	1	53	FEMALE	unknow	Stage IIIC	T1b	M0	N3a
TCGA-AO-A0J8	680	0	61	FEMALE	unknow	Stage IIA	T2	M0	N0 (i+)
TCGA-E2-A1IH	1026	0	80	FEMALE	unknow	Stage I	T1c	M0	N0
TCGA-BH-A0BC	974	0	60	FEMALE	unknow	Stage IIIC	T2	M0	N3
TCGA-E9-A2JT	288	0	63	FEMALE	unknow	Stage IIA	T2	M0	N0 (i-)
TCGA-BH-A0B3	1203	0	53	FEMALE	unknow	Stage IIB	T2	M0	N1a
TCGA-AC-A2B8	677	0	84	FEMALE	unknow	Stage IIB	T3	M0	N0 (i-)
TCGA-A1-A0SE	1321	0	56	FEMALE	unknow	Stage I	T1c	M0	N0 (i-)
TCGA-OL-A66J	1996	0	80	FEMALE	unknow	Stage I	T1c	MX	N0
TCGA-BH-A0B7	2559	0	42	FEMALE	unknow	Stage IIB	T2	M0	N1a
TCGA-E9-A3Q9	1001	0	78	FEMALE	unknow	Stage IIIC	T3	M0	N3
TCGA-BH-A0H5	1620	0	45	FEMALE	unknow	Stage I	T1c	M0	N0 (i-)
TCGA-E2-A1IU	337	0	60	FEMALE	unknow	Stage IA	T1c	M0	N0 (mol+)
TCGA-BH-A1FG	577	1	88	FEMALE	unknow	Stage I	T1c	M0	NX
TCGA-E2-A1B0	1631	0	50	FEMALE	unknow	Stage IIIA	T2	M0	N2
TCGA-C8-A278	297	0	61	FEMALE	unknow	Stage IIIA	T2	M0	N2
TCGA-E2-A107	1047	0	54	FEMALE	unknow	Stage IIIA	T3	M0	N2a
TCGA-A1-A0SI	635	0	52	FEMALE	unknow	Stage IIB	T2	M0	N1a
TCGA-D8-A1JP	639	0	73	FEMALE	unknow	Stage IA	T1c	M0	N0
TCGA-AC-A3EH	197	1	79	FEMALE	unknow	Stage IIIC	T3	M0	N3
TCGA-B6-A0IK	571	1	63	FEMALE	unknow	Stage IIIB	T4	M0	N1
TCGA-A7-A0DA	1085	0	62	FEMALE	unknow	Stage IIA	T2	M0	N0 (i-)
TCGA-A2-A0SV	825	1	63	FEMALE	unknow	Stage IV	T2	M1	N2a
TCGA-A8-A09D	1522	0	47	FEMALE	unknow	Stage IIB	T2	M0	N1
TCGA-BH-A209	3959	1	77	FEMALE	unknow	Stage I	T1c	M0	N0
TCGA-BH-A1FM	1388	1	44	FEMALE	unknow	Stage IIIA	T2	M0	N2
TCGA-LD-A66U	646	0	44	FEMALE	unknow	Stage IIB	T2	MX	N1mi
TCGA-AO-A0J7	618	0	71	FEMALE	unknow	Stage IIB	T2	M0	N1
TCGA-BH-A0C3	2709	0	47	FEMALE	unknow	Stage I	T1c	M0	N0
TCGA-D8-A1JB	1688	0	54	FEMALE	unknow	Stage IIB	T2	M0	N1a
TCGA-5L-AAT0	1477	0	42	FEMALE	unknow	Stage IIA	T2	M0	N0
TCGA-AO-A1KO	622	0	46	FEMALE	unknow	Stage IIB	T3	M0	N0 (i+)
TCGA-D8-A1XK	441	0	55	FEMALE	unknow	Stage IIB	T2	MX	N1a
TCGA-A8-A090	0	0	74	FEMALE	unknow	Stage IIA	T2	M0	N0
TCGA-AO-A03V	1351	0	41	FEMALE	unknow	Stage I	T1c	M0	N0 (i-)
TCGA-C8-A1HL	317	0	38	FEMALE	unknow	Stage IIIA	T3	M0	N1
TCGA-E2-A159	762	0	50	FEMALE	unknow	Stage IIA	T2	M0	N0
TCGA-A8-A075	518	0	42	FEMALE	unknow	Stage IIB	T2	M0	N1a
TCGA-BH-A0DE	2372	0	62	FEMALE	unknow	Stage IIA	T2	M0	N0
TCGA-BH-A0C0	1270	0	62	FEMALE	unknow	Stage IIA	T1c	M0	N1a
TCGA-A7-A0CJ	931	0	57	FEMALE	unknow	Stage IIA	T2	M0	N0 (i-)
TCGA-BH-A0B4	1191	0	65	MALE	unknow	Stage IIIA	T2	M0	N2
TCGA-EW-A1PD	424	0	61	MALE	unknow	Stage IIA	T1c	M0	N1a
TCGA-BH-A0DK	423	0	49	FEMALE	unknow	Stage IIA	T2	M0	N0 (i-)
TCGA-E2-A105	1308	0	79	FEMALE	unknow	Stage IIA	T2	M0	N0 (i-)
TCGA-B6-A0RO	4929	0	71	FEMALE	unknow	Stage IIIB	T4	M0	N1a
TCGA-AN-A0FV	10	0	58	FEMALE	unknow	Stage IIA	T2	M0	N0
TCGA-AN-A0AM	5	0	56	FEMALE	unknow	Stage IIA	T2	M0	N0
TCGA-BH-A8G0	662	0	54	FEMALE	unknow	Stage IIB	T2	M0	N1a
TCGA-E2-A154	591	0	68	FEMALE	unknow	Stage I	T1c	M0	N0
TCGA-BH-A0C7	2767	0	48	FEMALE	unknow	Stage IIB	T2	M0	N1mi
TCGA-EW-A1P1	1210	0	68	FEMALE	unknow	Stage IIIC	T2	MX	N3b
TCGA-AR-A24W	1550	0	55	FEMALE	unknow	Stage IIB	T2	M0	N1
TCGA-A7-A3RF	408	0	79	FEMALE	unknow	Stage IIA	T2	M0	N0
TCGA-BH-A0BG	1871	0	73	FEMALE	unknow	Stage I	T1	M0	N0
TCGA-AO-A0JF	1980	0	68	FEMALE	unknow	Stage IIA	T1c	M0	N1a
TCGA-EW-A1PG	1051	0	53	FEMALE	unknow	Stage IIB	T2	MX	N1a
TCGA-AC-A2BM	3022	0	41	FEMALE	unknow	Stage IIB	T2	MX	N1a
TCGA-BH-A18T	224	1	70	FEMALE	unknow	Stage IIA	T2	M0	N0
TCGA-BH-A5IZ	567	0	51	FEMALE	unknow	Stage IIB	T2	cM0 (i+)	N1a
TCGA-E2-A15J	1640	0	51	FEMALE	unknow	Stage I	T1c	M0	N0
TCGA-E2-A1IK	1800	0	71	FEMALE	unknow	Stage IIA	T1c	M0	N1mi
TCGA-A8-A09Z	0	0	83	FEMALE	unknow	Stage IIB	T3	M0	N0
TCGA-A8-A0A1	365	0	84	FEMALE	unknow	Stage IIA	T2	M0	N0
TCGA-BH-A0BZ	2255	0	59	FEMALE	unknow	Stage IIIA	T3	M0	N1a
TCGA-C8-A8HQ	380	0	53	FEMALE	unknow	Stage IIB	T2	M0	N1
TCGA-E2-A14N	1434	0	37	FEMALE	unknow	Stage IIB	T2	M0	N1
TCGA-A8-A092	942	0	48	FEMALE	unknow	Stage IIIA	T2	M0	N2a
TCGA-LL-A440	759	0	61	FEMALE	unknow	Stage IA	T1c	MX	N0 (i-)
TCGA-A2-A3KC	1102	0	55	FEMALE	unknow	Stage IIB	T2	M0	N1a
TCGA-B6-A0WW	558	1	58	FEMALE	unknow	Stage X	T2	MX	N1b
TCGA-B6-A0WX	639	1	40	FEMALE	unknow	Stage IIIA	T3	M0	N1b
TCGA-D8-A27F	488	0	40	FEMALE	unknow	Stage IIA	T2	M0	N0
TCGA-AN-A04D	52	0	58	FEMALE	unknow	Stage IIB	T2	M0	N1
TCGA-AR-A24M	3660	0	38	FEMALE	unknow	Stage IIIA	T2	M0	N2
TCGA-A8-A07R	273	0	80	FEMALE	unknow	Stage IIIC	T2	M0	N3a
TCGA-AR-A5QP	1185	0	54	FEMALE	unknow	Stage IIB	T2	M0	N1
TCGA-A8-A06R	547	0	69	FEMALE	unknow	Stage IIB	T2	M0	N1a
TCGA-A2-A04V	1920	1	39	FEMALE	unknow	Stage IIA	T2	M0	N0 (i-)
TCGA-OL-A66P	428	0	75	FEMALE	unknow	Stage IIA	T2	MX	N0
TCGA-A7-A26G	722	0	50	FEMALE	unknow	Stage IIA	T2	M0	N0 (i+)
TCGA-A1-A0SP	584	0	40	FEMALE	unknow	Stage IIA	T2	M0	N0 (i-)
TCGA-BH-AB28	287	0	53	FEMALE	unknow	Stage IIIA	T3	M0	N1a
TCGA-AC-A2BK	2222	0	78	FEMALE	unknow	Stage IIIA	T2	MX	N2a
TCGA-AC-A2FK	2650	0	45	FEMALE	unknow	Stage IIIC	T2	M0	N3a
TCGA-AO-A128	3248	0	61	FEMALE	unknow	Stage IIA	T2	M0	N0 (i-)
TCGA-BH-A18S	2009	1	79	FEMALE	unknow	Stage I	T1c	M0	N0
TCGA-OL-A66N	792	0	59	FEMALE	unknow	Stage IIIC	T3	MX	N3
TCGA-BH-A0E9	2489	0	53	FEMALE	unknow	Stage IIB	T2	M0	N1a
TCGA-D8-A27W	373	0	55	FEMALE	unknow	Stage IIIB	T4b	M0	N0
TCGA-AR-A24Z	3001	0	57	FEMALE	unknow	Stage IIA	T2	M0	N0
TCGA-D8-A1XY	503	0	74	FEMALE	unknow	Stage IIA	T2	MX	N0
TCGA-C8-A12M	358	0	70	FEMALE	unknow	Stage IIA	T2	M0	N0 (i-)
TCGA-BH-A18M	2207	1	39	FEMALE	unknow	Stage IIIA	T3	M0	N1
TCGA-B6-A0RM	2373	1	57	FEMALE	unknow	Stage X	TX	MX	NX
TCGA-E2-A15F	658	0	64	FEMALE	unknow	Stage I	T1c	M0	N0
TCGA-A2-A0YH	659	0	53	FEMALE	unknow	Stage IIIA	T2	M0	N2a
TCGA-B6-A0RG	2082	0	26	FEMALE	unknow	Stage IIB	T3	M0	N0 (i-)
TCGA-E9-A1NG	786	1	62	FEMALE	unknow	Stage IIA	T2	M0	N0
TCGA-B6-A0RV	5156	0	42	FEMALE	unknow	Stage IIIA	T3	M0	N2
TCGA-AO-A0J3	651	0	67	FEMALE	unknow	Stage IIB	T2	M0	N1b
TCGA-WT-AB41	1611	0	55	FEMALE	unknow	Stage IIB	T2	MX	N1mi
TCGA-E9-A1NF	1072	1	60	FEMALE	unknow	Stage IIA	T2	M0	N0
TCGA-AQ-A04J	819	0	45	FEMALE	unknow	Stage IIA	T2	M0	N0 (i+)
TCGA-AR-A0TX	1972	0	64	FEMALE	unknow	Stage IIA	T1	M0	N1
TCGA-A7-A13G	718	0	79	FEMALE	unknow	Stage IIA	T2	MX	N0
TCGA-GM-A3XL	2108	0	49	FEMALE	unknow	Stage IIA	T2	M0	N0 (i-)
TCGA-A7-A6VY	266	0	48	FEMALE	unknow	Stage IIB	T2	M0	N1
TCGA-GM-A2DL	3519	0	50	FEMALE	unknow	Stage I	T1c	M0	N0 (i-)
TCGA-E2-A9RU	0	0	90	FEMALE	unknow	Stage IIIC	T2	MX	N3a
TCGA-LL-A73Y	477	0	67	FEMALE	unknow	Stage IA	T1c	MX	N0
TCGA-AC-A3YJ	754	0	66	FEMALE	unknow	Stage IIA	T2	MX	N0 (i-)
TCGA-D8-A1XS	496	0	48	MALE	unknow	Stage IIIC	T2	M0	N3a
TCGA-D8-A1Y3	430	0	61	FEMALE	unknow	Stage IIIA	T2	MX	N2a
TCGA-B6-A0I6	991	1	49	FEMALE	unknow	Stage IIA	T1c	M0	N1
TCGA-AO-A1KR	2513	0	51	FEMALE	unknow	Stage IIA	T2	M0	N0
TCGA-EW-A1J5	477	0	59	FEMALE	unknow	Stage IIB	T3	M0	N0 (i-)
TCGA-E2-A56Z	252	0	69	FEMALE	unknow	Stage IIB	T2	M0	N1a
TCGA-AR-A1AH	3807	0	51	FEMALE	unknow	Stage IIB	T2	M0	N1
TCGA-BH-A18H	652	0	63	FEMALE	unknow	Stage IA	T1b	M0	N0
TCGA-AN-A0XP	9	0	69	FEMALE	unknow	Stage IIIA	T2	M0	N2
TCGA-C8-A3M7	1034	1	60	FEMALE	unknow	Stage IIIB	T4b	M0	N0
TCGA-OL-A66K	1275	1	72	FEMALE	unknow	Stage IIA	T2	MX	N0
TCGA-AC-A23E	698	0	50	FEMALE	unknow	Stage IIB	T2	MX	N1
TCGA-A2-A04U	2654	0	47	FEMALE	unknow	Stage IIA	T2	M0	N0 (i+)
TCGA-A2-A25C	523	0	50	FEMALE	unknow	Stage IIB	T2	M0	N1a
TCGA-A2-A0YI	1505	0	62	FEMALE	unknow	Stage I	T1c	M0	N0 (i+)
TCGA-A2-A0CO	1468	0	85	FEMALE	unknow	Stage IIB	T3	M0	N0
TCGA-GM-A3NY	1162	0	72	FEMALE	unknow	Stage IIB	T2	M0	N1a
TCGA-BH-A18R	1142	1	50	FEMALE	unknow	Stage IIA	T2b	M0	N1
TCGA-AO-A1KQ	1882	0	84	MALE	unknow	Stage IIIB	T4	M0	N1
TCGA-AN-A0XN	10	0	68	FEMALE	unknow	Stage IIIA	T2	M0	N2
TCGA-D8-A27K	1461	0	47	FEMALE	unknow	Stage IIB	T2	M0	N1a
TCGA-LL-A5YO	440	0	50	FEMALE	unknow	Stage IA	T1b	MX	N0
TCGA-S3-AA12	574	0	82	FEMALE	unknow	Stage IIIA	T3	MX	N1a
TCGA-E2-A15I	1692	0	44	FEMALE	unknow	Stage IIA	T2	M0	N0
TCGA-BH-A1EO	2798	1	68	FEMALE	unknow	Stage IIA	T1c	M0	N1
TCGA-BH-A0C1	1411	1	61	FEMALE	unknow	Stage IIIA	T3	M0	N2a
TCGA-C8-A12Y	1476	0	44	FEMALE	unknow	Stage IIB	T2	M0	N1
TCGA-AO-A03R	2091	0	57	FEMALE	unknow	Stage IIB	T2	M0	N1a
TCGA-D8-A27R	307	0	41	FEMALE	unknow	Stage IIIC	T2	M0	N3a
TCGA-OL-A66H	812	0	74	FEMALE	unknow	Stage IB	T1c	MX	N1mi
TCGA-D8-A142	425	0	74	FEMALE	unknow	Stage IIB	T3	M0	N0
TCGA-AQ-A04L	3957	0	48	FEMALE	unknow	Stage IIA	T2	MX	N0 (i-)
TCGA-E2-A14V	1042	0	53	FEMALE	unknow	Stage IIB	T2	M0	N1
TCGA-A7-A13D	965	0	46	FEMALE	unknow	Stage IIA	T2	M0	N0 (i-)
TCGA-A2-A0CK	4159	0	60	FEMALE	unknow	Stage IIIA	T3	M0	N2a
TCGA-E9-A1R5	92	0	63	FEMALE	unknow	Stage IA	T1c	M0	N0
TCGA-AC-A8OP	614	0	72	FEMALE	unknow	Stage IA	T1c	MX	N0 (i-)
TCGA-OL-A6VR	1220	0	48	FEMALE	unknow	Stage IA	T1b	MX	N0
TCGA-AC-A3OD	451	0	68	FEMALE	unknow	Stage IIB	T2	MX	N1mi
TCGA-B6-A0RN	8008	0	60	FEMALE	unknow	Stage IA	T1c	M0	N0 (i-)
TCGA-AC-A3TM	762	0	50	FEMALE	unknow	Stage IIIA	T3	M0	N1mi
TCGA-B6-A0RU	8605	0	40	FEMALE	unknow	Stage IA	T1c	M0	N0 (i-)
TCGA-AR-A2LN	1161	0	65	FEMALE	unknow	Stage IIA	T2	M0	N0
TCGA-OL-A97C	271	0	67	FEMALE	unknow	Stage IIB	T3	M0	N0
TCGA-BH-A0HA	1611	0	31	FEMALE	unknow	Stage I	T1c	M0	N0 (i-)
TCGA-A2-A25F	322	0	66	FEMALE	unknow	Stage IIA	T2	M0	N0 (i-)
TCGA-BH-A1FH	1034	1	47	FEMALE	unknow	Stage IV	T2	M1	N1b
TCGA-C8-A134	383	0	52	FEMALE	unknow	Stage IIA	T2	M0	N0
TCGA-A1-A0SO	852	0	67	FEMALE	unknow	Stage IIB	T2	M0	N1
TCGA-AR-A24K	1548	0	46	FEMALE	unknow	Stage IIA	T2	M0	N0
TCGA-AR-A1AP	2856	0	80	FEMALE	unknow	Stage I	T1	M0	N0
TCGA-AN-A0AR	10	0	55	FEMALE	unknow	Stage IIA	T2	M0	N0
TCGA-E2-A1LS	1604	0	46	FEMALE	unknow	Stage IA	T1c	M0	N0
TCGA-B6-A0IB	3941	1	64	FEMALE	unknow	Stage IV	T3	M1	N3
TCGA-A2-A1G1	584	0	85	FEMALE	unknow	Stage IIB	T2	M0	N1
TCGA-E9-A1NA	1112	0	58	FEMALE	unknow	Stage IIA	T2	M0	N0
TCGA-A2-A0D0	2048	0	60	FEMALE	unknow	Stage IIA	T2	M0	N0 (i-)
TCGA-AC-A2FG	1853	0	79	FEMALE	unknow	Stage IIB	T2	MX	N1a
TCGA-E2-A1IJ	865	0	57	FEMALE	unknow	Stage I	T1c	M0	N0
TCGA-AC-A5EH	511	0	76	FEMALE	unknow	Stage IIB	T2	MX	N1mi
TCGA-BH-A1F8	1	1	90	FEMALE	unknow	Stage IIIB	T4b	M0	N2
TCGA-D8-A1JD	552	0	41	FEMALE	unknow	Stage IIB	T2	M0	N1a
TCGA-A2-A3XX	1439	1	49	FEMALE	unknow	Stage IIA	T2	M0	N0
TCGA-E2-A15M	336	1	66	FEMALE	unknow	Stage IIA	T2	M0	N0
TCGA-A2-A4RW	222	0	49	FEMALE	unknow	Stage IIIC	T2	M0	N3a
TCGA-AN-A0AK	224	0	76	FEMALE	unknow	Stage IIA	T2	M0	N0
TCGA-C8-A12X	385	0	62	FEMALE	unknow	Stage IIB	T2	M0	N1
TCGA-AR-A5QN	1013	0	68	FEMALE	unknow	Stage IIIC	T2	M0	N3
TCGA-A8-A0A6	640	0	64	FEMALE	unknow	Stage IIIC	T2	M0	N3a
TCGA-BH-A0B5	2136	0	40	FEMALE	unknow	Stage IIIA	T2	M0	N2a
TCGA-E2-A14T	2311	0	52	FEMALE	unknow	Stage IIA	T2	M0	N0
TCGA-B6-A1KF	3088	0	68	FEMALE	unknow	Stage IIB	T2	M0	N1
TCGA-A2-A4RX	742	0	67	FEMALE	unknow	Stage IIA	T2	M0	N0
TCGA-AC-A2QH	1005	0	58	FEMALE	unknow	Stage IIB	T3	MX	N0
TCGA-E9-A3QA	918	0	33	FEMALE	unknow	Stage IIA	T2	M0	N0 (i-)
TCGA-Z7-A8R5	3287	0	61	FEMALE	unknow	Stage IIIA	T3	MX	N1a
TCGA-B6-A1KC	1326	0	67	FEMALE	unknow	Stage IIB	T2	M0	N1
TCGA-AN-A0AS	10	0	70	FEMALE	unknow	Stage IIIA	T2	M0	N2
TCGA-A2-A25D	0	0	90	FEMALE	unknow	Stage IIIC	T2	M0	N3a
TCGA-A8-A07S	243	0	73	FEMALE	unknow	Stage IIA	T2	M0	N0
TCGA-C8-A138	380	0	54	FEMALE	unknow	Stage IIIA	T2	M0	N2
TCGA-AR-A24X	3004	0	52	FEMALE	unknow	Stage IIA	T2	M0	N0
TCGA-EW-A1P7	915	0	59	FEMALE	unknow	Stage IIA	T2	M0	N0 (i-)
TCGA-A2-A0CP	2813	0	60	FEMALE	unknow	Stage IA	T1c	M0	N0 (i-)
TCGA-C8-A1HI	343	0	40	FEMALE	unknow	Stage IIIA	T2	M0	N2
TCGA-A8-A091	1004	0	61	FEMALE	unknow	Stage IIA	T2	M0	N0
TCGA-E2-A14Q	1163	0	50	FEMALE	unknow	Stage IIB	T2	M0	N1mi
TCGA-BH-A8FZ	574	0	58	FEMALE	unknow	Stage IA	T1b	M0	N0
TCGA-AO-A1KP	2953	0	77	FEMALE	unknow	Stage IIA	T1	M0	N1
TCGA-E2-A1L9	598	0	40	FEMALE	unknow	Stage IIA	T1c	M0	N1mi
TCGA-AN-A0FL	231	0	62	FEMALE	unknow	Stage IIA	T2	M0	N0
TCGA-AN-A0AT	10	0	62	FEMALE	unknow	Stage IIA	T2	M0	N0
TCGA-GM-A2DC	2535	0	57	FEMALE	unknow	Stage IIA	T1c	M0	N1a
TCGA-BH-A1EN	2127	1	78	FEMALE	unknow	Stage IIA	T2	M0	NX
TCGA-A1-A0SM	242	0	77	MALE	unknow	Stage IIA	T2	M0	N0 (i-)
TCGA-BH-A0BF	1324	1	56	FEMALE	unknow	Stage IIB	T2	M0	N1mi
TCGA-A7-A0CH	1079	0	79	FEMALE	unknow	Stage IIA	T2	M0	N0 (i-)
TCGA-D8-A1Y1	302	1	80	FEMALE	unknow	Stage IIIA	T3	MX	N1a
TCGA-AO-A0J5	792	1	48	FEMALE	unknow	Stage IV	T4	M1	N1a
TCGA-A2-A0EU	1043	0	79	FEMALE	unknow	Stage IA	T1c	M0	N0 (i-)
TCGA-E2-A106	2541	0	34	FEMALE	unknow	Stage IB	T1c	M0	N1mi
TCGA-E2-A108	837	0	64	FEMALE	unknow	Stage IIIA	T2	M0	N2a
TCGA-E2-A1II	1025	0	51	FEMALE	unknow	Stage I	T1c	M0	N0
TCGA-C8-A8HR	408	0	49	FEMALE	unknow	Stage IIIA	T3	M0	N2
TCGA-E9-A247	1186	0	59	FEMALE	unknow	Stage IA	T1c	M0	N0 (i-)
TCGA-BH-A0HF	727	0	77	FEMALE	unknow	Stage IA	T1c	M0	N0 (i-)
TCGA-A1-A0SK	967	1	54	FEMALE	unknow	Stage IIA	T2	M0	N0 (i-)
TCGA-D8-A1XZ	466	0	81	FEMALE	unknow	Stage IIIA	T1c	MX	N2a
TCGA-A2-A3Y0	1546	0	57	FEMALE	unknow	Stage IIB	T2	M0	N1a
TCGA-BH-A204	2534	1	80	FEMALE	unknow	Stage IIB	T2	M0	N1b
TCGA-D8-A1XT	506	0	61	FEMALE	unknow	Stage IIA	T1c	M0	N1a
TCGA-BH-A0BS	2612	0	55	FEMALE	unknow	Stage IIIA	T3	M0	N1c
TCGA-C8-A26W	381	0	58	FEMALE	unknow	Stage IIB	T2	M0	N1
TCGA-A8-A08T	3409	1	64	FEMALE	unknow	Stage IV	T2	M1	N1a
TCGA-AO-A0JL	1683	0	59	FEMALE	unknow	Stage IIIA	T2	M0	N2a
TCGA-A8-A0A9	822	0	80	FEMALE	unknow	Stage IIA	T2	M0	N0
TCGA-AR-A24R	3430	0	45	FEMALE	unknow	Stage IIIA	T1	M0	N2
TCGA-AR-A24V	3203	0	52	FEMALE	unknow	Stage IIB	T2	M0	N1
TCGA-E2-A1LE	879	1	71	FEMALE	unknow	Stage IIIC	T2	M0	N3a
TCGA-A2-A3XT	2770	0	45	FEMALE	unknow	Stage IIB	T2	M0	N1a
TCGA-A2-A0EM	3094	0	73	FEMALE	unknow	Stage IA	T1	M0	N0 (i-)
TCGA-BH-A1ES	3462	1	35	FEMALE	unknow	Stage IIB	T2	M0	N1a
TCGA-A8-A07Z	1371	0	85	FEMALE	unknow	Stage IIA	T2	M0	N0
TCGA-AO-A0JG	798	0	49	FEMALE	unknow	Stage IIIA	T2	M0	N2a
TCGA-D8-A1JC	480	0	59	FEMALE	unknow	Stage IIIA	T2	M0	N2a
TCGA-D8-A1XB	552	0	62	FEMALE	unknow	Stage IIB	T2	M0	N1a
TCGA-BH-A0E6	293	0	69	FEMALE	unknow	Stage IA	T1c	M0	N0 (i-)
TCGA-E2-A2P5	821	1	78	FEMALE	unknow	Stage IIIC	T2	M0	N3
TCGA-EW-A1P4	907	0	43	FEMALE	unknow	Stage IIA	T2	M0	N0 (i-)
TCGA-A8-A085	1124	0	44	MALE	unknow	Stage IIB	T2	M0	N1a
TCGA-BH-A208	1759	1	48	FEMALE	unknow	Stage IIB	T2	M0	N1b
TCGA-EW-A2FS	1604	0	41	FEMALE	unknow	Stage IIB	T2	MX	N1mi
TCGA-AO-A125	3456	0	72	FEMALE	unknow	Stage IIA	T2	M0	N0 (i-)
TCGA-A7-A2KD	679	0	53	FEMALE	unknow	Stage IIIA	T2	MX	N2a
TCGA-BH-A0DG	2041	0	30	FEMALE	unknow	Stage IIA	T2	M0	N0
TCGA-E9-A3HO	1158	0	49	FEMALE	unknow	Stage IIA	T2	M0	N0 (i-)
TCGA-AR-A0TS	2558	0	46	FEMALE	unknow	Stage IIB	T2	M0	N1
TCGA-E9-A1NI	300	0	51	FEMALE	unknow	Stage IIA	T2	M0	N0
TCGA-A2-A25B	1291	0	39	FEMALE	unknow	Stage IIB	T2	M0	N1
TCGA-BH-A0HW	1561	0	62	FEMALE	unknow	Stage IA	T1c	M0	N0 (i-)
TCGA-BH-A0H3	1928	0	46	FEMALE	unknow	Stage I	T1c	M0	N0
TCGA-OL-A6VQ	600	0	49	FEMALE	unknow	Stage IIA	T2	MX	N0
TCGA-AC-A8OR	40	0	75	FEMALE	unknow	Stage IA	T1c	MX	N0 (i-)
TCGA-AC-A3QQ	734	0	54	FEMALE	unknow	Stage IA	T1c	MX	N0 (i-)
TCGA-BH-A5J0	715	0	63	FEMALE	unknow	Stage IA	T1c	M0	N0
TCGA-D8-A27L	499	0	49	FEMALE	unknow	Stage IIIA	T1c	M0	N2a
TCGA-A7-A4SF	545	0	54	FEMALE	unknow	Stage IIA	T2	M0	N0
TCGA-A2-A0YJ	566	0	39	FEMALE	unknow	Stage IIIA	T3	M0	N2a
TCGA-D8-A141	626	0	40	FEMALE	unknow	unknow	T1c	M0	N1
TCGA-AC-A6IV	568	0	47	FEMALE	unknow	Stage IIB	T2	MX	N1
TCGA-EW-A1IX	1208	0	48	FEMALE	unknow	Stage IIA	T1b	MX	N1a
TCGA-A2-A0EV	968	0	80	FEMALE	unknow	Stage IA	T1c	M0	N0 (i-)
TCGA-AR-A1AV	1864	0	68	MALE	unknow	Stage IIB	T2	M0	N1
TCGA-B6-A0WZ	6292	0	50	FEMALE	unknow	Stage II	T2	M0	N1b
TCGA-A7-A5ZV	368	0	62	FEMALE	unknow	Stage IIA	T2	M0	N0
TCGA-PL-A8LX	5	0	35	FEMALE	unknow	Stage IV	T4	M1	N1a
TCGA-C8-A1HF	332	0	48	FEMALE	unknow	Stage IIA	T2	M0	N0
TCGA-AQ-A7U7	584	1	55	FEMALE	unknow	Stage IIIA	T2	M0	N2a
TCGA-A8-A07J	365	0	35	FEMALE	unknow	Stage IIB	T2	M0	N1a
TCGA-PL-A8LV	-7	0	54	FEMALE	unknow	Stage IIIB	T4	M0	N0
TCGA-A2-A0CV	3011	0	41	FEMALE	unknow	Stage IIB	T2	M0	N1a
TCGA-AO-A12D	2515	0	43	FEMALE	unknow	Stage IIA	T1c	M0	N1a
TCGA-B6-A40C	2164	0	51	FEMALE	unknow	Stage IIB	T3	M0	N0 (i-)
TCGA-E9-A1N9	1101	0	58	FEMALE	unknow	Stage IIA	T2	M0	N0
TCGA-A8-A06N	0	0	66	FEMALE	unknow	Stage IIIB	T4b	M0	N0
TCGA-S3-AA15	525	0	51	FEMALE	unknow	Stage IIB	T2	cM0 (i+)	N1a
TCGA-A2-A0D2	1027	0	45	FEMALE	unknow	Stage IIA	T2	M0	N0 (i+)
TCGA-LL-A9Q3	532	0	69	FEMALE	unknow	Stage IIIC	T3	MX	N3a
TCGA-A8-A06O	396	0	60	FEMALE	unknow	Stage I	T1c	M0	N0
TCGA-S3-AA11	421	0	67	FEMALE	unknow	Stage IIA	T2	M0	N0
TCGA-AQ-A1H2	475	0	84	FEMALE	unknow	Stage IIIA	T2	MX	N2a
TCGA-E9-A2JS	904	1	72	FEMALE	unknow	Stage IIB	T2	M0	N1
TCGA-E2-A1L6	1648	0	44	FEMALE	unknow	Stage IIA	T1c	M0	N1mi
TCGA-B6-A0IA	8391	0	51	FEMALE	unknow	Stage IIA	T2	M0	N0 (i-)
TCGA-A2-A0YG	666	0	63	FEMALE	unknow	Stage IIIC	T2	M0	N3a
TCGA-B6-A0IQ	4285	0	40	FEMALE	unknow	Stage IIIA	T3	M0	N1b
TCGA-AC-A4ZE	890	0	63	FEMALE	unknow	Stage IIB	T3	M0	N0
TCGA-D8-A13Z	635	0	51	FEMALE	unknow	unknow	T2	M0	N2a
TCGA-B6-A0IE	1993	1	38	FEMALE	unknow	Stage IIIA	T3	M0	N1b
TCGA-A2-A04Q	2385	0	48	FEMALE	unknow	Stage IA	T1	M0	N0 (i-)
TCGA-OL-A5RX	878	0	51	FEMALE	unknow	Stage IA	T1c	MX	N0
TCGA-C8-A26Z	470	0	59	FEMALE	unknow	Stage IIA	T2	M0	N0
TCGA-A8-A07I	426	0	69	FEMALE	unknow	Stage IIIA	T2	M0	N2a
TCGA-E9-A3X8	926	0	48	FEMALE	unknow	Stage IIB	T2	M0	N1
TCGA-AR-A1AW	2632	0	65	FEMALE	unknow	Stage IIA	T2	M0	N0
TCGA-C8-A1HK	366	0	53	FEMALE	unknow	Stage IIB	T2	M0	N1
TCGA-LL-A5YL	519	0	64	FEMALE	unknow	Stage IIB	T2	MX	N1a
TCGA-EW-A1PB	608	0	70	FEMALE	unknow	Stage IIIA	T3	MX	N1a
TCGA-HN-A2NL	79	0	56	FEMALE	unknow	Stage IIA	T2	M0	N0
TCGA-A2-A0T2	255	1	66	FEMALE	unknow	Stage IV	T3	M1	N3
TCGA-LD-A7W5	216	0	52	FEMALE	unknow	Stage IIIC	T2	M0	N3a
TCGA-AO-A12H	1234	0	69	FEMALE	unknow	Stage IIA	T2	M0	N0 (i-)
TCGA-B6-A0RI	7126	0	44	FEMALE	unknow	Stage IIIB	T4b	M0	N1b
TCGA-B6-A0RT	2721	0	39	FEMALE	unknow	Stage IIIA	T3	M0	N1
TCGA-A2-A3XS	1032	1	62	FEMALE	unknow	Stage IIIA	T1	M0	N2a
TCGA-AN-A0FN	218	0	61	FEMALE	unknow	Stage IA	T1c	M0	N0
TCGA-E2-A15T	1563	0	65	FEMALE	unknow	Stage IIA	T2	M0	N0
TCGA-BH-A0HY	1545	0	60	FEMALE	unknow	Stage I	T1c	M0	N0
TCGA-AR-A2LR	1742	0	49	FEMALE	unknow	Stage I	T1	M0	N0
TCGA-BH-A0DX	2156	0	62	FEMALE	unknow	Stage I	T1b	M0	N0
TCGA-BH-A1EV	365	1	45	FEMALE	unknow	Stage IIIA	T3	M0	N1b
TCGA-AO-A03P	2911	1	54	FEMALE	unknow	Stage IIB	T2	M0	N1
TCGA-S3-AA0Z	629	0	63	FEMALE	unknow	Stage IIB	T2	M0	N1a
TCGA-LL-A6FP	0	0	90	FEMALE	unknow	Stage IIA	T2	MX	NX
TCGA-BH-A0W3	728	0	58	FEMALE	unknow	Stage IIA	T1c	M0	N1a
TCGA-AN-A0FX	10	0	52	FEMALE	unknow	Stage IIA	T2	M0	N0
TCGA-A7-A56D	448	0	84	FEMALE	unknow	Stage IIA	T2	M0	N0
TCGA-BH-A0DI	912	0	63	FEMALE	unknow	Stage IIB	T2	M0	N1a
TCGA-A8-A08X	1308	0	43	FEMALE	unknow	Stage IIIC	T4d	M0	N3a
TCGA-D8-A73U	492	0	88	FEMALE	unknow	Stage IIA	T2	M0	N0
TCGA-D8-A1XC	377	1	85	FEMALE	unknow	Stage IIIB	T4b	M0	N1a
TCGA-A1-A0SJ	416	0	39	FEMALE	unknow	Stage IIIA	T3	M0	N1a
TCGA-A2-A1FV	714	0	74	FEMALE	unknow	Stage IIB	T3	M0	N0 (i+)
TCGA-C8-A1HJ	5	0	53	FEMALE	unknow	Stage IIA	T2	M0	N0
TCGA-E9-A228	1285	0	58	FEMALE	unknow	Stage IIB	T2	M0	N1
TCGA-JL-A3YX	352	0	46	FEMALE	unknow	Stage IIA	T2	M0	N0
TCGA-D8-A145	410	0	80	FEMALE	unknow	Stage IIA	T1c	M0	N1a
TCGA-BH-A18I	1093	0	53	FEMALE	unknow	Stage IIA	T1c	cM0 (i+)	N1a
TCGA-E9-A1RE	1419	0	74	FEMALE	unknow	Stage IIIA	T2	M0	N2
TCGA-A7-A426	364	0	50	FEMALE	unknow	Stage IIIC	T3	MX	N3a
TCGA-AO-A0JC	1547	0	64	FEMALE	unknow	Stage IIA	T2	M0	N0 (i-)
TCGA-AR-A1AQ	3021	0	49	FEMALE	unknow	Stage IIA	T2	M0	N0
TCGA-BH-A203	1174	1	78	FEMALE	unknow	Stage IIB	T2	M0	N1b
TCGA-D8-A1XW	1309	0	53	FEMALE	unknow	Stage IIA	T2	M0	N0
TCGA-AC-A3W5	504	0	65	FEMALE	unknow	Stage IIA	T2	MX	N0
TCGA-E2-A1LA	748	0	59	FEMALE	unknow	Stage IIA	T1c	M0	N1a
TCGA-E2-A15G	554	0	76	FEMALE	unknow	Stage IIA	T2	M0	N0
TCGA-B6-A1KN	4233	0	57	FEMALE	unknow	Stage IIIB	T4b	M0	N1
TCGA-E2-A1IE	2362	0	61	FEMALE	unknow	Stage IIB	T2	M0	N1
TCGA-A2-A0CQ	2695	0	62	FEMALE	unknow	Stage IA	T1	M0	N0 (i-)
TCGA-AN-A0XV	162	0	67	FEMALE	unknow	Stage IIIA	T2	M0	N2
TCGA-BH-A0BT	2365	0	56	FEMALE	unknow	Stage IIA	T1c	M0	N1mi
TCGA-OL-A5RV	1062	0	43	FEMALE	unknow	Stage IIIC	T2	MX	N3
TCGA-B6-A0I1	2361	1	73	FEMALE	unknow	Stage IIA	T2	M0	N0
TCGA-BH-A1F6	2965	1	51	FEMALE	unknow	unknow	T4d	MX	N2a
TCGA-A1-A0SB	259	0	70	FEMALE	unknow	Stage I	T1c	M0	N0
TCGA-A2-A0YC	990	0	59	FEMALE	unknow	Stage IIB	T2	M0	N1mi
TCGA-E2-A155	640	0	58	FEMALE	unknow	Stage IIB	T2	M0	N1a
TCGA-AO-A1KS	350	0	69	FEMALE	unknow	Stage IIA	T2	M0	N0 (i-)
TCGA-EW-A423	533	0	75	FEMALE	unknow	Stage IIA	T2	MX	N0
TCGA-A2-A0CS	2348	1	73	FEMALE	unknow	Stage IV	T4b	M1	N3a
TCGA-D8-A1X9	727	0	66	FEMALE	unknow	Stage IIB	T2	M0	N1a
TCGA-AR-A0TP	4275	0	43	FEMALE	unknow	Stage IIA	T2	M0	N0
TCGA-3C-AALI	4005	0	50	FEMALE	unknow	Stage IIB	T2	M0	N1a
TCGA-E2-A2P6	1051	0	77	FEMALE	unknow	Stage IIB	T2	M0	N1
TCGA-E2-A158	450	0	43	FEMALE	unknow	Stage IIA	T1c	M0	N1mi
TCGA-S3-AA14	529	0	47	FEMALE	unknow	Stage I	T1	cM0 (i+)	N0 (i+)
TCGA-AR-A1AI	3296	0	47	FEMALE	unknow	Stage IIA	T2	M0	N0
TCGA-GM-A3NW	3361	0	63	FEMALE	unknow	Stage IIA	T2	M0	N0 (i-)
TCGA-A8-A07L	975	0	58	FEMALE	unknow	Stage IIIA	T3	M0	N1a
TCGA-LL-A5YM	394	0	88	FEMALE	unknow	Stage IIIB	T4b	M0	NX
TCGA-LQ-A4E4	849	0	73	FEMALE	unknow	Stage IIIA	T3	MX	N1a
TCGA-A7-A4SA	454	0	40	FEMALE	unknow	Stage IIB	T2	M0	N1a
TCGA-BH-A0BV	1519	0	78	FEMALE	unknow	Stage IIB	T2	M0	N1a
TCGA-B6-A0WY	3461	1	40	FEMALE	unknow	Stage IIIA	T3	M0	N1b
TCGA-BH-A201	856	0	64	FEMALE	unknow	Stage IA	T1	M0	N0
TCGA-E2-A572	1208	0	72	FEMALE	unknow	Stage IIIA	T2	M0	N2
TCGA-A8-A09M	1006	0	75	FEMALE	unknow	Stage IIIC	T2	M0	N3a
TCGA-BH-A0DP	476	0	60	FEMALE	unknow	Stage IIB	T3	M0	N0 (i-)
TCGA-AR-A2LE	5062	0	69	FEMALE	unknow	Stage I	T1	M0	N0
TCGA-OL-A5D8	973	0	40	FEMALE	unknow	Stage IIB	T3	MX	N0
TCGA-E9-A1NH	576	0	71	FEMALE	unknow	Stage IIB	T2	M0	N1
TCGA-BH-A0W7	1363	0	49	FEMALE	unknow	Stage I	T1c	M0	N0 (i-)
TCGA-A1-A0SF	1463	0	54	FEMALE	unknow	Stage IIA	T2	M0	N0
TCGA-A8-A09R	273	0	82	FEMALE	unknow	Stage IIB	T2	M0	N1
TCGA-A8-A06Z	31	0	84	FEMALE	unknow	Stage IIB	T3	M0	N0
TCGA-A8-A09G	0	0	79	FEMALE	unknow	Stage IIIC	T3	M0	N3a
TCGA-A2-A04T	2246	0	62	FEMALE	unknow	Stage IIA	T2	M0	N0 (i-)
TCGA-D8-A27I	439	0	58	FEMALE	unknow	Stage IIIA	T1c	M0	N2a
TCGA-A2-A0SW	1365	1	82	FEMALE	unknow	Stage IV	T2	M1	N2
TCGA-BH-A18U	1563	1	72	FEMALE	unknow	Stage IIIA	T2	M0	N2a
TCGA-EW-A1PF	439	0	50	FEMALE	unknow	Stage IA	T1c	M0	N0
TCGA-LD-A7W6	404	0	54	FEMALE	unknow	Stage IIB	T2	M0	N1a
TCGA-BH-A0E0	134	0	38	FEMALE	unknow	Stage IIIC	T3	M0	N3a
TCGA-D8-A1XJ	664	0	76	FEMALE	unknow	Stage IIIA	T3	MX	N1a
TCGA-A7-A26I	661	0	65	FEMALE	unknow	Stage IIA	T2	M0	N0
TCGA-A2-A04X	1686	0	34	FEMALE	unknow	Stage IIA	T2	M0	N0 (i-)
TCGA-AN-A0XU	10	0	54	FEMALE	unknow	Stage IIA	T2	M0	N0
TCGA-A8-A07O	304	0	51	FEMALE	unknow	Stage IIA	T2	M0	N0
TCGA-D8-A147	584	0	45	FEMALE	unknow	unknow	T2	M0	N0
TCGA-E2-A10C	1220	0	54	FEMALE	unknow	Stage IIB	T2	M0	N1a
TCGA-EW-A1P6	562	0	64	FEMALE	unknow	Stage IIB	T2	M0	N1a
TCGA-C8-A275	1	0	56	FEMALE	unknow	Stage IIA	T1	M0	N1
TCGA-A8-A0AD	1157	0	83	FEMALE	unknow	Stage I	T1c	M0	N0
TCGA-A8-A07F	577	0	65	FEMALE	unknow	Stage IIB	T2	M0	N1a
TCGA-AO-A12E	2142	0	51	FEMALE	unknow	Stage IIB	T3	M0	N0 (i+)
TCGA-A2-A1G0	616	0	49	FEMALE	unknow	Stage IIB	T2	M0	N1a
TCGA-LD-A9QF	323	0	73	FEMALE	unknow	Stage IA	T1c	M0	N0
TCGA-AC-A6IX	373	0	49	FEMALE	unknow	Stage IIIC	T2	MX	N3a
TCGA-AO-A12A	3112	0	47	FEMALE	unknow	Stage IIA	T2	M0	N0 (i+)
TCGA-C8-A131	411	0	82	FEMALE	unknow	Stage IIIA	T2	M0	N2
TCGA-AR-A0U3	4080	0	59	FEMALE	unknow	Stage IIB	T2	M0	N1
TCGA-D8-A27H	397	0	72	FEMALE	unknow	Stage IIA	T2	M0	N0
TCGA-A8-A079	274	0	69	FEMALE	unknow	Stage IIIB	T4b	M0	N3
TCGA-A8-A07U	760	0	66	FEMALE	unknow	Stage IIIA	T2	M0	N2a
TCGA-C8-A12O	385	0	50	FEMALE	unknow	Stage IIA	T2	M0	N0 (i-)
TCGA-B6-A402	2281	0	47	FEMALE	unknow	Stage I	T1c	M0	N0 (i-)
TCGA-E9-A22E	1269	0	56	FEMALE	unknow	Stage IIIA	T2	M0	N2
TCGA-A8-A07P	334	0	68	FEMALE	unknow	Stage IIB	T2	M0	N1
TCGA-E2-A14Y	2109	0	35	FEMALE	unknow	Stage IIA	T2	M0	N0
TCGA-BH-A18P	921	1	60	FEMALE	unknow	Stage I	T1	M0	N0
TCGA-E9-A1R0	860	0	58	FEMALE	unknow	Stage IIA	T1c	M0	N1
TCGA-A8-A07B	1308	0	69	FEMALE	unknow	Stage IIA	T2	M0	N0
TCGA-AN-A0FY	10	0	55	FEMALE	unknow	Stage IA	T1c	M0	N0
TCGA-E2-A153	707	0	51	FEMALE	unknow	Stage IIB	T2	M0	N1a
TCGA-B6-A0IN	2573	1	45	FEMALE	unknow	Stage X	T1c	MX	NX
TCGA-A8-A09X	426	1	62	FEMALE	unknow	Stage IIIC	T2	M0	N3a
TCGA-D8-A1JJ	611	0	54	FEMALE	unknow	Stage IIA	T2	M0	N0
TCGA-A2-A0CY	1673	0	63	FEMALE	unknow	Stage IIB	T2	M0	N1
TCGA-A2-A0T6	575	0	50	FEMALE	unknow	Stage IIB	T3	M0	N0 (i-)
TCGA-D8-A1XD	522	0	36	FEMALE	unknow	Stage IIIA	T1c	M0	N2a
TCGA-AN-A046	10	0	68	FEMALE	unknow	Stage IIA	T2	M0	N0
TCGA-E2-A15H	393	0	38	FEMALE	unknow	Stage IIA	T1c	M0	N1mi
TCGA-A8-A08I	365	0	53	FEMALE	unknow	Stage IIA	T2	M0	N0
TCGA-D8-A1XU	395	0	56	FEMALE	unknow	Stage IA	T1c	M0	N0
TCGA-BH-A1FB	3669	1	60	FEMALE	unknow	Stage IIB	T2	M0	N1b
TCGA-GM-A2DO	2596	0	54	FEMALE	unknow	Stage I	T1c	M0	N0 (i-)
TCGA-A2-A0EX	752	0	46	FEMALE	unknow	Stage IIB	T3	M0	N0 (i+)
TCGA-A8-A09K	912	0	68	FEMALE	unknow	Stage IIA	T1c	M0	N1
TCGA-OL-A66O	528	0	39	FEMALE	unknow	Stage IIB	T2	MX	N1a
TCGA-A7-A13H	899	0	61	FEMALE	unknow	Stage IIB	T2	MX	N1a
TCGA-AQ-A54N	78	0	51	FEMALE	unknow	Stage IIA	T2	M0	N0
TCGA-E9-A22A	1189	0	74	FEMALE	unknow	Stage IIA	T2	M0	N0
TCGA-BH-A0H7	702	0	65	FEMALE	unknow	Stage IIIA	T1c	M0	N2a
TCGA-AR-A254	2605	0	50	FEMALE	unknow	Stage IIIA	T2	M0	N2
TCGA-E9-A1RC	1224	0	56	FEMALE	unknow	Stage IIIC	T4b	M0	N3
TCGA-AR-A250	2707	0	58	FEMALE	unknow	Stage IIA	T2	M0	N0
TCGA-AC-A6NO	51	0	43	FEMALE	unknow	Stage IIB	T2	MX	N1a
TCGA-AR-A1AN	2920	0	46	FEMALE	unknow	Stage IIA	T2	M0	N0
TCGA-E2-A14X	972	0	55	FEMALE	unknow	Stage IIIA	T2	M0	N2
TCGA-AC-A5XU	455	0	74	FEMALE	unknow	Stage IIB	T3	MX	N0 (i-)
TCGA-E9-A1N3	1059	0	70	FEMALE	unknow	Stage IIIA	T1c	M0	N2
TCGA-BH-A0W5	1288	0	77	FEMALE	unknow	Stage IIA	T1c	M0	N1a
TCGA-B6-A3ZX	1152	1	50	FEMALE	unknow	Stage IV	T3	M1	N1
TCGA-AC-A2FM	792	1	87	FEMALE	unknow	Stage IIB	T2	M0	N1mi
TCGA-D8-A1J8	431	0	77	FEMALE	unknow	Stage IIB	T2	M0	N1a
TCGA-E9-A54X	727	0	85	FEMALE	unknow	Stage IA	T1b	M0	N0 (i-)
TCGA-E2-A1BC	501	0	63	FEMALE	unknow	Stage IA	T1c	M0	N0
TCGA-D8-A1JF	366	0	79	FEMALE	unknow	Stage IIIA	T1c	M0	N2a
TCGA-OL-A66I	714	0	36	FEMALE	unknow	Stage IIA	T1c	MX	N1mi
TCGA-AC-A6IW	413	0	73	FEMALE	unknow	Stage IIA	T2	MX	N0 (i-)
TCGA-BH-A0AW	622	0	56	FEMALE	unknow	Stage IIA	T1c	M0	N1a
TCGA-BH-A0B8	1569	0	64	FEMALE	unknow	Stage I	T1b	M0	N0 (i-)
TCGA-A2-A3XU	912	1	35	FEMALE	unknow	Stage IIB	T2	M0	N1mi
TCGA-B6-A408	2072	0	55	FEMALE	unknow	Stage IIIC	T2	M0	N3a
TCGA-E2-A1B6	867	0	44	FEMALE	unknow	Stage IIA	T2	M0	N0
TCGA-C8-A12W	385	0	49	FEMALE	unknow	Stage IIIB	T4	M0	N1
TCGA-A8-A095	1277	0	45	FEMALE	unknow	Stage I	T1c	M0	N0
TCGA-BH-A1FE	2273	1	31	FEMALE	unknow	Stage IIB	T2	M0	N1
TCGA-A2-A04Y	1099	0	53	FEMALE	unknow	Stage IIB	T2	M0	N1mi
TCGA-A8-A07E	608	0	81	FEMALE	unknow	Stage X	T4b	MX	N3a
TCGA-B6-A0X0	3945	1	54	FEMALE	unknow	Stage I	T1c	M0	N0 (i-)
TCGA-A2-A0T5	531	0	39	FEMALE	unknow	Stage IIA	T2	M0	N0 (i-)
TCGA-LL-A6FR	489	0	50	FEMALE	unknow	Stage IIA	T2	MX	N0 (i-)
TCGA-AO-A03U	1793	1	31	FEMALE	unknow	Stage I	T1c	M0	N0 (i-)
TCGA-AR-A24O	3607	0	43	FEMALE	unknow	Stage IIIA	T3	M0	N2
TCGA-A2-A1FX	1847	0	61	FEMALE	unknow	Stage IIIA	T3	M0	N2a
TCGA-Z7-A8R6	3256	0	46	FEMALE	unknow	Stage I	T1c	M0	N0
TCGA-C8-A1HM	375	0	74	FEMALE	unknow	Stage IIA	T2	M0	N0
TCGA-A2-A0CU	158	1	73	FEMALE	unknow	Stage IIA	T2	M0	N0 (i+)
TCGA-BH-A0HX	829	0	54	FEMALE	unknow	Stage IIB	T2	M0	N1a
TCGA-A2-A0ER	2263	0	63	FEMALE	unknow	Stage IB	T1c	M0	N1mi
TCGA-AR-A1AU	2868	0	39	FEMALE	unknow	Stage IIIA	T2	M0	N2
TCGA-C8-A12K	0	0	80	FEMALE	unknow	Stage IIB	T2	M0	N1
TCGA-AC-A2FE	2636	1	62	FEMALE	unknow	Stage IIIC	T3	MX	N3a
TCGA-D8-A1XV	461	0	84	FEMALE	unknow	Stage IIA	T2	M0	N0
TCGA-A2-A0YM	965	0	67	FEMALE	unknow	Stage IIA	T2	M0	N0 (i-)
TCGA-D8-A1XA	839	0	64	FEMALE	unknow	Stage IA	T1c	M0	N0
TCGA-AN-A03X	10	0	74	FEMALE	unknow	Stage IIA	T2	M0	N0
TCGA-BH-A42V	635	0	41	FEMALE	unknow	Stage IB	T1c	M0	N1mi
TCGA-AR-A2LL	2012	0	70	FEMALE	unknow	Stage IIB	T3	M0	N0
TCGA-A2-A4RY	648	0	46	FEMALE	unknow	Stage IIIC	T3	M0	N3a
TCGA-A8-A09T	579	0	68	FEMALE	unknow	unknow	T1c	MX	N0
TCGA-AC-A3HN	496	0	87	FEMALE	unknow	Stage IIB	T2	MX	N1a
TCGA-EW-A6SD	1010	0	32	FEMALE	unknow	Stage IIB	T2	M0	N1a
TCGA-A8-A093	546	0	61	FEMALE	unknow	Stage IIA	T2	M0	N0
TCGA-B6-A0IH	2965	1	81	FEMALE	unknow	Stage IIIA	T3	M0	N1b
TCGA-A2-A0CL	3015	0	37	FEMALE	unknow	Stage IIIA	T3	M0	N2a
TCGA-AO-A129	3286	0	29	FEMALE	unknow	Stage IIB	T2	M0	N1a
TCGA-D8-A1Y0	472	0	65	FEMALE	unknow	Stage IIIA	T1c	MX	N2a
TCGA-AR-A1AX	2629	0	64	FEMALE	unknow	Stage I	T1	M0	N0
TCGA-E9-A24A	747	0	69	FEMALE	unknow	Stage IIA	T1c	M0	N1
TCGA-BH-A0HN	516	0	67	FEMALE	unknow	Stage IA	T1c	M0	N0 (i-)
TCGA-D8-A143	431	0	51	FEMALE	unknow	Stage IIA	T2	M0	N0
TCGA-BH-A0DQ	98	0	42	FEMALE	unknow	Stage IIB	T2	M0	N1
TCGA-A8-A09C	31	0	69	FEMALE	unknow	Stage X	T2	MX	N0
TCGA-AN-A049	19	0	62	FEMALE	unknow	Stage IIA	T2	M0	N0
TCGA-E9-A226	1048	1	45	FEMALE	unknow	Stage IIIA	T2	M0	N2
TCGA-AR-A2LH	616	1	55	FEMALE	unknow	Stage III	T3	M0	N3
TCGA-AR-A24Q	3172	0	49	FEMALE	unknow	Stage IIB	T3	M0	N0
TCGA-E2-A15R	1732	0	64	FEMALE	unknow	Stage IIA	T1c	M0	N1a
TCGA-E2-A15C	694	0	61	FEMALE	unknow	Stage I	T1c	M0	N0
TCGA-PE-A5DC	1430	1	72	FEMALE	unknow	Stage IIIA	T2	M0	N2a
TCGA-B6-A0I8	749	1	46	FEMALE	unknow	Stage X	T1	M0	NX
TCGA-BH-A0BD	554	0	47	FEMALE	unknow	Stage IIA	T1c	M0	N1a
TCGA-A8-A09V	457	0	51	FEMALE	unknow	Stage IIA	T2	M0	N0
TCGA-A8-A08Z	1217	0	76	FEMALE	unknow	unknow	T4b	M0	N3a
TCGA-A2-A0YL	1474	0	48	FEMALE	unknow	Stage IIIA	T3	M0	N2a
TCGA-A2-A0D1	1051	0	76	FEMALE	unknow	Stage IIA	T2	M0	N0 (i-)
TCGA-B6-A0I2	4361	0	45	FEMALE	unknow	Stage IA	T1c	M0	N0 (i-)
TCGA-A2-A0SU	1662	0	66	FEMALE	unknow	Stage IIA	T2	M0	N0 (i+)
TCGA-A8-A06P	396	0	63	FEMALE	unknow	Stage IIIA	T1c	M0	N2a
TCGA-AO-A0JB	1542	0	50	FEMALE	unknow	Stage IIIA	T3	M0	N1a
TCGA-B6-A2IU	5176	0	62	FEMALE	unknow	Stage IIA	T2	M0	N0
TCGA-C8-A273	513	0	29	FEMALE	unknow	Stage IIB	T2	M0	N1
TCGA-XX-A89A	488	0	68	FEMALE	unknow	Stage IIB	T3	MX	N0
TCGA-A8-A09I	1371	0	84	FEMALE	unknow	Stage IIA	T2	M0	N0
TCGA-C8-A27A	747	0	48	FEMALE	unknow	Stage IIB	T2	M0	N1
TCGA-AO-A12C	2372	0	42	FEMALE	unknow	Stage IIB	T2	M0	N1a
TCGA-A8-A08B	1156	0	52	FEMALE	unknow	Stage IIA	T2	M0	N0
TCGA-C8-A1HO	375	0	34	FEMALE	unknow	Stage IIIC	T3	M0	N3
TCGA-C8-A1HE	375	0	59	FEMALE	unknow	Stage IIA	T2	M0	N0
TCGA-BH-A0DL	2381	0	64	FEMALE	unknow	Stage IIA	T2	M0	N0
TCGA-BH-A6R8	293	0	46	FEMALE	unknow	Stage IIA	T2	M0	N0
TCGA-EW-A2FW	672	0	52	FEMALE	unknow	Stage IIA	T2	MX	N0 (i-)
TCGA-E2-A10F	878	0	47	FEMALE	unknow	Stage IIA	T2	M0	N0 (i-)
TCGA-GM-A3XN	2019	0	44	FEMALE	unknow	Stage IIIA	T1c	M0	N2a
TCGA-C8-A12T	0	0	43	FEMALE	unknow	Stage IIA	T2	M0	N0
TCGA-OL-A5D7	1780	0	70	FEMALE	unknow	Stage IIA	T2	MX	N0
TCGA-AQ-A0Y5	172	1	70	FEMALE	unknow	Stage IIIA	T2	MX	N2a
TCGA-A2-A1FZ	683	0	63	FEMALE	unknow	Stage IIA	T2	M0	N0 (i-)
TCGA-3C-AALJ	1474	0	62	FEMALE	unknow	Stage IIB	T2	M0	N1a
TCGA-V7-A7HQ	2033	0	75	FEMALE	unknow	Stage IIIA	T1c	M0	N2a
TCGA-AR-A255	2161	0	62	FEMALE	unknow	Stage I	T1	M0	N0
TCGA-A7-A6VW	285	0	48	FEMALE	unknow	Stage IIA	T2	M0	N0
TCGA-BH-A0W4	759	0	46	FEMALE	unknow	Stage IIA	T2	M0	N0 (i-)
TCGA-GM-A2DF	2155	0	53	FEMALE	unknow	Stage IIA	T1c	M0	N1a
TCGA-E2-A1LI	3121	0	57	FEMALE	unknow	Stage IIB	T2	M0	N1
TCGA-A2-A0ET	1066	0	58	FEMALE	unknow	Stage IIIA	T2	M0	N2a
TCGA-B6-A0RE	7777	0	61	FEMALE	unknow	Stage X	TX	M0	N0 (i-)
TCGA-A8-A06Q	31	0	63	FEMALE	unknow	Stage IIIA	T3	M0	N2
TCGA-LL-A441	996	0	62	FEMALE	unknow	Stage IA	T1c	MX	N0
TCGA-BH-A0DT	2403	0	41	FEMALE	unknow	Stage IIA	T1c	M0	N1a
TCGA-C8-A274	508	0	63	FEMALE	unknow	Stage IIA	T2	M0	N0
TCGA-LL-A442	889	0	56	FEMALE	unknow	Stage IIA	T2	MX	N0 (i-)
TCGA-E2-A573	1062	0	48	FEMALE	unknow	Stage IA	T1c	M0	N0
TCGA-C8-A26Y	0	0	90	FEMALE	unknow	Stage IIA	T2	M0	N0
TCGA-GM-A2D9	1812	1	69	FEMALE	unknow	Stage I	T1c	M0	N0 (i-)
TCGA-A2-A0EO	2442	0	54	FEMALE	unknow	Stage IA	T1	M0	N0 (i-)
TCGA-B6-A0WS	2965	1	58	FEMALE	unknow	Stage X	T1c	MX	NX
TCGA-BH-A0HP	414	0	65	FEMALE	unknow	Stage IIIA	T3	M0	N2a
TCGA-D8-A1JU	447	0	51	FEMALE	unknow	Stage IA	T1c	M0	N0
TCGA-A2-A1G4	595	0	71	FEMALE	unknow	Stage IIIA	T3	M0	N1a
TCGA-A8-A094	0	0	75	FEMALE	unknow	Stage IIA	T2	M0	N0
TCGA-BH-A0DV	2064	0	54	FEMALE	unknow	Stage IIIA	T2	M0	N2a
TCGA-A2-A0EY	1925	0	62	FEMALE	unknow	Stage IIB	T2	M0	N1a
TCGA-AR-A24N	3035	0	54	FEMALE	unknow	Stage I	T1	M0	N0
TCGA-AR-A1AS	1150	0	54	FEMALE	unknow	Stage IIB	T2	M0	N1
TCGA-BH-A0HI	620	0	78	FEMALE	unknow	Stage IA	T1c	M0	N0 (i-)
TCGA-A7-A13E	614	1	62	FEMALE	unknow	Stage IIB	T2	MX	N1
TCGA-AN-A0XL	163	0	61	FEMALE	unknow	Stage IIA	T2	M0	N0
TCGA-A8-A084	458	0	81	FEMALE	unknow	Stage IIB	T2	M0	N1a
TCGA-AN-A0G0	16	0	56	FEMALE	unknow	Stage IIA	T2	M0	N0
TCGA-D8-A13Y	1728	0	52	FEMALE	unknow	Stage IA	T1c	M0	N0
TCGA-AN-A0XR	10	0	55	FEMALE	unknow	Stage IIIA	T2	M0	N2
TCGA-D8-A1JI	577	0	54	FEMALE	unknow	Stage IIA	T1c	MX	N1a
TCGA-E9-A227	975	0	42	FEMALE	unknow	Stage IIB	T2	M0	N1
TCGA-E2-A574	1179	0	44	FEMALE	unknow	Stage IIA	T2	M0	N0
TCGA-A8-A086	396	0	59	FEMALE	unknow	Stage IIA	T1c	M0	N1a
TCGA-A2-A0ES	2190	0	52	FEMALE	unknow	Stage IIA	T2	M0	N0 (i-)
TCGA-A7-A0CE	1074	0	57	FEMALE	unknow	Stage IIA	T2	M0	N0 (i-)
TCGA-BH-A0DH	1156	0	63	FEMALE	unknow	Stage IIB	T2	M0	N1a
TCGA-A2-A0T4	624	0	62	FEMALE	unknow	Stage IIA	T2	M0	N0 (i-)
TCGA-B6-A401	2596	0	47	FEMALE	unknow	Stage IIA	T1c	M0	N1a
TCGA-AR-A2LM	1935	0	49	FEMALE	unknow	Stage II	T1	M0	N1
TCGA-GM-A2DB	2406	0	62	FEMALE	unknow	Stage IIA	T2	M0	N0 (i-)
TCGA-A2-A0ST	3017	0	62	FEMALE	unknow	Stage IIA	T1c	M0	N1a
TCGA-B6-A0WT	5739	0	61	FEMALE	unknow	Stage IIB	T2	M0	N1
TCGA-E2-A1LG	1523	0	50	FEMALE	unknow	Stage IIA	T2	M0	N0
TCGA-E9-A6HE	847	0	45	FEMALE	unknow	Stage IIIC	T3	MX	N3
TCGA-GM-A3XG	1330	0	46	FEMALE	unknow	Stage IIIA	T3	M0	N1a
TCGA-JL-A3YW	360	0	49	FEMALE	unknow	Stage IIB	T2	M0	N1
TCGA-D8-A1JN	620	0	80	FEMALE	unknow	Stage IIIC	T3	MX	N3a
TCGA-D8-A1Y2	433	0	71	FEMALE	unknow	Stage IIA	T2	MX	N0
TCGA-D8-A1XM	538	0	57	FEMALE	unknow	Stage IA	T1c	M0	N0
TCGA-BH-A0BW	2371	0	71	FEMALE	unknow	Stage I	T1c	M0	N0
TCGA-D8-A27V	381	0	62	FEMALE	unknow	Stage IIA	T2	M0	N0
TCGA-A2-A4S2	643	0	62	FEMALE	unknow	Stage IIIA	T3	M0	N2
TCGA-EW-A424	715	0	51	FEMALE	unknow	Stage IIIA	T3	MX	N1
TCGA-A1-A0SG	434	0	61	FEMALE	unknow	Stage IIB	T2	M0	N1a
TCGA-LL-A8F5	596	0	61	FEMALE	unknow	Stage IIA	T2	MX	N0 (i-)
TCGA-D8-A73X	767	0	53	FEMALE	unknow	Stage IIA	T2	M0	N0
TCGA-E9-A1RD	34	0	67	FEMALE	unknow	Stage IIA	T2	M0	N0
TCGA-OL-A6VO	858	0	43	FEMALE	unknow	Stage IA	T1c	MX	N0
TCGA-B6-A0I5	8556	0	49	FEMALE	unknow	Stage IIB	T2	M0	N1b
TCGA-BH-A1FD	1009	1	68	FEMALE	unknow	Stage I	T1c	M0	N0
TCGA-D8-A1XR	482	0	56	FEMALE	unknow	Stage IIB	T2	M0	N1a
TCGA-BH-A0B9	1572	0	44	FEMALE	unknow	Stage IA	T1c	M0	N0 (i-)
TCGA-BH-A0AV	1820	0	52	FEMALE	unknow	Stage I	T1c	M0	N0
TCGA-E2-A3DX	1325	0	43	FEMALE	unknow	Stage IIIC	T2	M0	N3
TCGA-BH-A0HQ	1121	0	56	FEMALE	unknow	Stage IIA	T2	M0	N0 (i+)
TCGA-A7-A4SC	446	0	62	FEMALE	unknow	Stage IIB	T3	MX	N0
TCGA-C8-A137	379	0	34	FEMALE	unknow	Stage IIB	T2	M0	N1
TCGA-S3-AA17	424	0	64	FEMALE	unknow	Stage IIB	T2	cM0 (i+)	N1mi
TCGA-AC-A3W7	471	0	66	FEMALE	unknow	Stage IIB	T2	MX	N1a
TCGA-AN-A0FK	213	0	88	FEMALE	unknow	Stage IIIB	T4	M0	N0
TCGA-A2-A0YD	769	0	63	FEMALE	unknow	Stage IIB	T3	M0	N0 (i+)
TCGA-D8-A1JH	426	0	56	FEMALE	unknow	Stage IA	T1c	M0	N0
TCGA-BH-A0H0	461	0	69	FEMALE	unknow	Stage IA	T1c	M0	N0 (i-)
TCGA-AN-A0XW	170	0	36	FEMALE	unknow	Stage IIIA	T2	M0	N2
TCGA-AR-A5QQ	322	1	68	FEMALE	unknow	Stage IIIA	T3	M0	N1
TCGA-E9-A1NC	1203	0	61	FEMALE	unknow	Stage IIB	T2	M0	N1
TCGA-B6-A1KI	2236	0	63	FEMALE	unknow	Stage I	T1c	M0	N0
TCGA-E2-A14U	1318	0	74	FEMALE	unknow	Stage I	T1c	M0	N0
TCGA-OL-A5DA	1783	0	61	FEMALE	unknow	Stage IIA	T2	MX	N0
TCGA-A8-A07C	1034	0	57	FEMALE	unknow	Stage IIA	T2	M0	N0
TCGA-EW-A1IY	258	0	38	FEMALE	unknow	Stage I	T1c	MX	N0
TCGA-AN-A0AL	227	0	41	FEMALE	unknow	Stage IIIB	T4	M0	N0
TCGA-A2-A0CM	754	1	40	FEMALE	unknow	Stage IIA	T2	M0	N0 (i-)
TCGA-AR-A24H	4894	0	65	FEMALE	unknow	Stage IIA	T2	M0	N0
TCGA-LL-A7SZ	594	0	49	FEMALE	unknow	Stage IIB	T2	MX	N1a
TCGA-D8-A1JE	575	0	62	FEMALE	unknow	Stage IIA	T1c	M0	N1a
TCGA-E9-A1N5	1120	0	45	FEMALE	unknow	Stage IIB	T2	M0	N1
TCGA-BH-A0BO	2197	0	54	FEMALE	unknow	Stage I	T1b	M0	N0
TCGA-A8-A08G	607	0	41	FEMALE	unknow	Stage IIA	T2	M0	N0
TCGA-AR-A1AR	524	1	50	FEMALE	unknow	Stage IIIA	T1	M0	N2
TCGA-A2-A0YT	723	1	56	FEMALE	unknow	Stage IIIB	T4b	M0	N2a
TCGA-AN-A0XO	375	0	59	FEMALE	unknow	Stage IIIA	T2	M0	N2
TCGA-A2-A0CZ	1616	0	46	FEMALE	unknow	Stage IIA	T2	M0	N0 (i-)
TCGA-E9-A1NE	1088	0	28	FEMALE	unknow	Stage IIB	T2	M0	N1
TCGA-E9-A1R2	1063	0	51	FEMALE	unknow	Stage IIIC	T2	MX	N3
TCGA-B6-A0RQ	4267	1	68	FEMALE	unknow	Stage IIB	T3	M0	N0 (i-)
TCGA-AC-A23C	585	0	62	FEMALE	unknow	Stage IIB	T2	MX	N1
TCGA-BH-A0BL	2278	0	35	FEMALE	unknow	Stage I	T1c	M0	N0
TCGA-A8-A076	1642	0	66	FEMALE	unknow	Stage IIA	T2	M0	N0
TCGA-A1-A0SN	1196	0	50	FEMALE	unknow	Stage IIA	T1c	MX	N1
TCGA-A8-A08O	943	0	45	FEMALE	unknow	Stage IV	T2	M1	N3a
TCGA-AC-A8OQ	34	0	72	FEMALE	unknow	Stage IIB	T2	MX	N1a
TCGA-E9-A22D	1248	0	38	FEMALE	unknow	Stage IIA	T2	M0	N0
TCGA-AR-A24L	2866	1	26	FEMALE	unknow	Stage IIB	T2	M0	N1
TCGA-E2-A1LK	266	1	84	FEMALE	unknow	Stage IIIC	T4b	M0	N3a
